# Supplementary material for: Isolation of the elusive [Ru(bipy)3]+: a key intermediate in photoredox catalysis
Source: Royal Society of Chemistry journal article supplement (doi:10.1039/d3cc04375d), 2023-01-01
Supplement: d3cc04375d1.pdf [file d3cc04375d1.pdf]

## Supporting Information

# Isolation of the elusive $[\text{Ru}(\text{bipy})_3]^+$ : a key intermediate in photoredox catalysis.

Samuel J. Horsewill,<sup>[a]</sup> Chengyang Cao,<sup>[b]</sup> Noah Dabney,<sup>[c]</sup> Eric S. Yang,<sup>[b]</sup> Stephen Faulkner<sup>[b]</sup>  
and Daniel J. Scott\*<sup>[a]</sup>

<sup>[a]</sup> Department of Chemistry, University of Bath, Claverton Down, Bath, BA2 7AY, United Kingdom

<sup>[b]</sup> Department of Chemistry, Chemistry Research Laboratory, University of Oxford, 12 Mansfield Road, Oxford, OX1 3TA, United Kingdom

<sup>[c]</sup> Department of Chemistry, Guilford College, 5800 W Friendly Ave., Greensboro, NC 27410 (US)

\*E-mail: [ds2630@bath.ac.uk](mailto:ds2630@bath.ac.uk)

# Contents

|     |                                                                                                        |    |
|-----|--------------------------------------------------------------------------------------------------------|----|
| 1   | Methods.....                                                                                           | 2  |
| 1.1 | General experimental procedures.....                                                                   | 2  |
| 1.2 | LED apparatus.....                                                                                     | 3  |
| 2   | Synthesis and characterisation.....                                                                    | 4  |
| 2.1 | Preparation of <b>[Ru]Cl<sub>2</sub></b> .....                                                         | 4  |
| 2.2 | Synthesis and characterisation of <b>[Ru]Cl</b> .....                                                  | 4  |
| 2.3 | Synthesis and characterisation of <b>[Ru][BPh<sub>4</sub>]</b> .....                                   | 7  |
| 3   | Reactivity.....                                                                                        | 10 |
| 3.1 | Photostability studies.....                                                                            | 10 |
| 3.2 | Reduction of aryl halides by <b>[Ru][BPh<sub>4</sub>]</b> .....                                        | 17 |
| 3.3 | Reduction chemistry of <b>[Ru]Cl<sub>2</sub></b> .....                                                 | 27 |
| 4   | Crystallographic information.....                                                                      | 32 |
| 4.1 | XRD data for <b>[Ru][BPh<sub>4</sub>]</b> .....                                                        | 32 |
| 4.2 | Crystallographic collection data and full bond information for <b>[Ru][BPh<sub>4</sub>]</b> -THF.....  | 35 |
| 4.3 | Crystallographic collection data and full bond information for <b>[Ru][BPh<sub>4</sub>]</b> -MeCN..... | 38 |
| 5   | References.....                                                                                        | 41 |

# 1 Methods

## 1.1 General experimental procedures

Unless stated otherwise, all reactions, manipulations and spectroscopic acquisitions were performed under an N<sub>2</sub> or Ar atmosphere (< 0.1 ppm O<sub>2</sub>, H<sub>2</sub>O) through use of MBraun Labmaster or MBraun MB20G gloveboxes and standard Schlenk line techniques. All glassware was oven dried (>160 °C) overnight prior to use.

Hexane and toluene were collected from an Innovative Technologies inc. PS-400-7 solvent purification system before being degassed and stored over molecular sieves (3 Å). THF was pre-dried over activated molecular sieves (3 Å), then dried in a sodium/benzophenone still, before being degassed and stored over molecular sieves (3 Å). CH<sub>3</sub>CN was pre-dried over activated molecular sieves (3 Å), then dried in a calcium hydride still, before being degassed and stored over molecular sieves (3 Å). CD<sub>3</sub>CN was dried by refluxing over CaH<sub>2</sub>, then was degassed and distilled before being stored over molecular sieves (3 Å). KC<sub>8</sub> was prepared according to literature procedure.<sup>1</sup> Unless otherwise stated, [Ru(bipy)<sub>3</sub>]Cl<sub>2</sub>·6H<sub>2</sub>O and all other starting materials were purchased from major suppliers. [Ru(bipy)<sub>3</sub>]Cl<sub>2</sub>·6H<sub>2</sub>O was dehydrated by heating to 60 °C with stirring under vacuum overnight. Unless supplied under inert atmosphere or noted otherwise, all other solids were dried under vacuum and liquids were degassed and dried over molecular sieves (3 Å).

NMR spectra were recorded on a Bruker Avance (400 MHz), Bruker Neo (400 MHz), or an Agilent ProPulse (500 MHz) spectrometer. Chemical shifts,  $\delta$ , are reported in parts per million (ppm); <sup>1</sup>H and <sup>13</sup>C NMR shifts were referenced externally to SiMe<sub>4</sub> and referenced internally to residual solvent peaks, while <sup>31</sup>P NMR shifts were referenced externally to 85% H<sub>3</sub>PO<sub>4</sub> (aq.), and <sup>11</sup>B NMR shifts were referenced externally to 15% BF<sub>3</sub>·OEt<sub>2</sub> in CDCl<sub>3</sub>. The abbreviations s, d, t, q, m are used to indicate singlets, doublets, triplets, quartets and multiplets respectively. Except where indicated otherwise, integrals for <sup>31</sup>P{<sup>1</sup>H} and <sup>31</sup>P spectra are provided for the purposes of qualitative comparison only and should not be considered quantitatively accurate.

EPR spectra were recorded at room temperature on a Bruker EMXmicro X-band continuous wave EPR spectrometer at the CAESR facility at the University of Oxford. UV-vis spectra were recorded at room temperature using an Ocean Optics assembly with an Ocean Optics DH2000 light source and Ocean Insight Flame miniature spectrometer, using fibre-optic cables to pass light through a sample in the glovebox. Elemental analysis was performed by Orla McCullough at London Metropolitan University, with each measurement performed in duplicate either with a combustible ([Ru]Cl<sub>2</sub>, [Ru][BPh<sub>4</sub>]) or without ([Ru]Cl) and provided alongside a separately measured standard (acetanilide). We attribute the C and N values being slightly below the calculated values for [Ru]Cl<sub>2</sub> and [Ru]Cl to incomplete combustion. Mass spectrometry was performed by Paul Gates at the University of Bristol, on samples dissolved in DCM/MeCN (50%) and run in positive mode with nanospray ionisation using an Advion Nanomate chip-based nanospray system attached to a Waters Synapt G2S Mass Spectrometer.

## 1.2 LED apparatus

The LED apparatus used was the same as that in a recent publication.<sup>2</sup> For clarity, this information is reproduced here. Individual LEDs are mounted to a heatsink plate, with the six-LED array powered by a 28 W power supply. The sample block was kept cool by circulation of cooling water, and JY NMR tubes were positioned above the LEDs in a bath of deionised water to assist with thermal transfer. The LEDs used for this study are listed below:

Luminus SST-10-UV-A130, UV (365 nm)

Osram OSOLON SSL 120, Deep Blue (455 nm)

Osram OSOLON SSL 120, Green (530 nm)

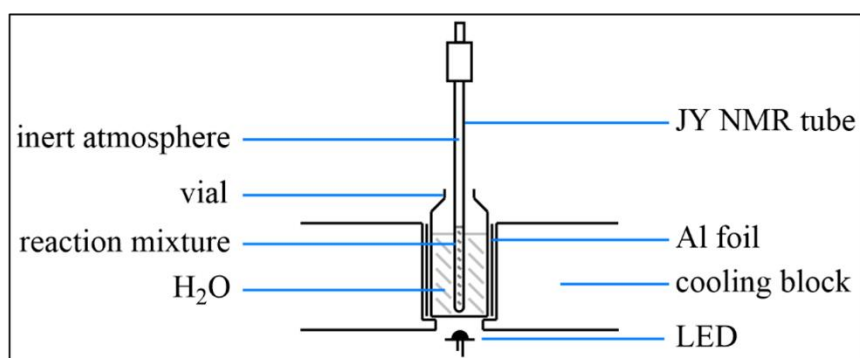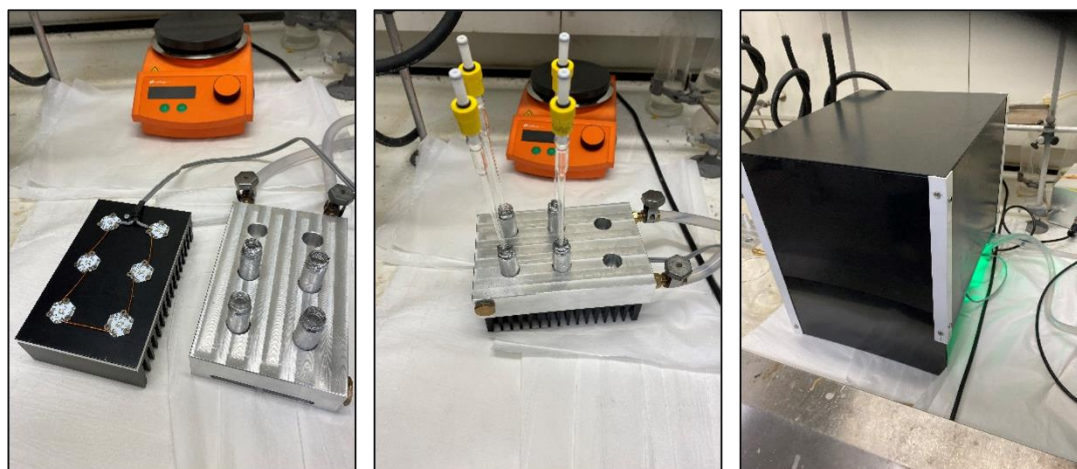

**Figure S1: Illustration and photographs of the apparatus used for photochemical experiments. Similar apparatus has been described previously by the Wolf group.<sup>3</sup> Illustration not to scale. Sockets in cooling block have diameter 1.8 cm to fit vials. Base of vial is ca. 9 mm above the LEDs.**

## 2 Synthesis and characterisation

### 2.1 Preparation of [Ru]Cl<sub>2</sub>

A Schlenk flask was charged with [Ru(bipy)<sub>3</sub>]Cl<sub>2</sub>·6H<sub>2</sub>O (ca. 5 g) and heated to 60 °C with stirring *in vacuo* for 16 h. A colour change from red to orange was observed as the water was driven off. An NMR spectrum was recorded in CD<sub>3</sub>CN, showing complete dehydration.

<sup>1</sup>H NMR (CD<sub>3</sub>CN): δ = 8.65 (dt, J = 8.3, 1.1 Hz, 6H, **bipy**), 8.06 (ddd, J = 8.2, 7.6, 1.5 Hz, 6H, **bipy**), 7.73 (ddd, J = 5.6, 1.5, 0.7 Hz, 6H, **bipy**), 7.40 (ddd, J = 7.7, 5.6, 1.3 Hz, 6H, **bipy**).

UV-vis (CH<sub>3</sub>CN): λ<sub>max</sub> (ε) = 245 (2.92 × 10<sup>4</sup>), 289 (3.83 × 10<sup>4</sup>), 447 nm (1.87 × 10<sup>4</sup> M<sup>-1</sup> cm<sup>-1</sup>).

Elemental Analysis: Anal. Calcd. for [Ru]Cl<sub>2</sub>: C, 56.25%; H, 3.78%; N, 13.12%. Found: C, 55.46-55.90%; H, 3.77-3.93%; N, 12.79-12.86%.

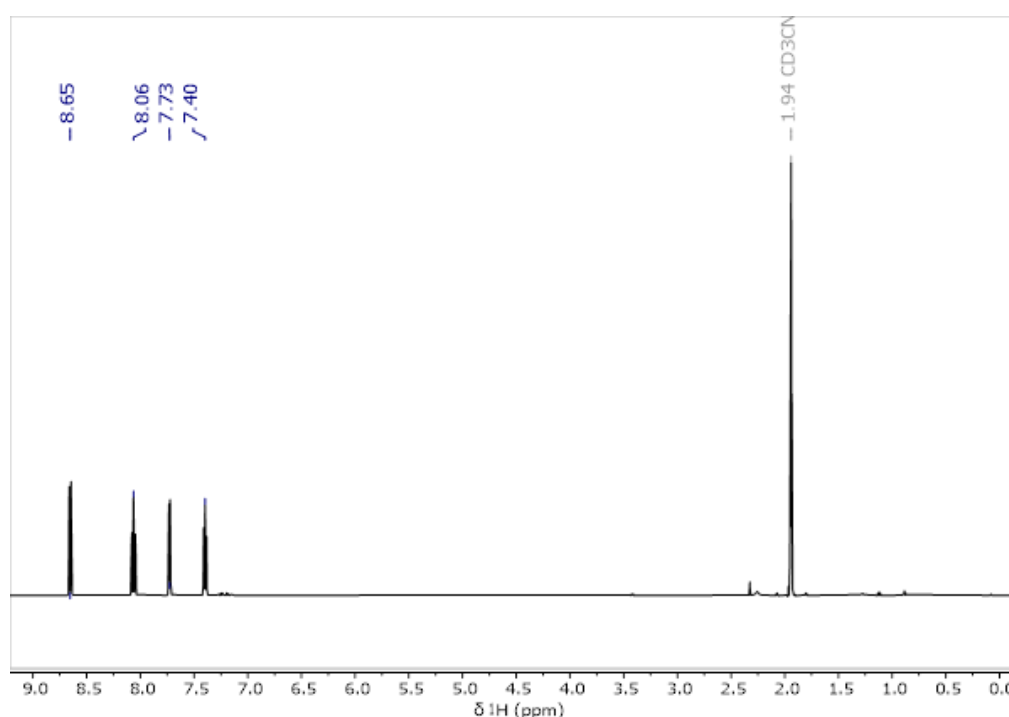

Figure S2: <sup>1</sup>H NMR spectrum of [Ru]Cl<sub>2</sub> recorded in CD<sub>3</sub>CN. Assignment: **bipy**, δ = 8.65, 8.06, 7.73 and 7.40 ppm.

### 2.2 Synthesis and characterisation of [Ru]Cl

A Schlenk flask was charged with [Ru]Cl<sub>2</sub> (200.2 mg, 0.313 mmol) and KC<sub>8</sub> (51.4 mg, 0.380 mmol), then THF (30 mL) was added with stirring. An immediate colour change from orange to pink-red was observed and the mixture was stirred for a further 1 hr. After setting up a Soxhlet extraction apparatus and flushing it with nitrogen, the suspension was transferred *via* cannula into the extraction cup *in situ*. Soxhlet extraction was then performed, using a total of 60 mL THF and refluxing for 20 hr. The solids were occasionally agitated inside the extraction cup using a magnetic stirrer bar and a magnet outside the vessel. THF was removed from the filtrates under vacuum, leaving [Ru]Cl as a dark red solid, which was washed with hexane (3x 10 mL), then dried and weighed (50.0 mg, 0.0781 mmol, 25%). As expected, no resonances were observed in the <sup>1</sup>H NMR spectrum of this material.

UV-vis (CH<sub>3</sub>CN): λ<sub>max</sub> (ε) = 244 (1.48 × 10<sup>4</sup>), 290 (3.04 × 10<sup>4</sup>), 341 (0.89 × 10<sup>4</sup>), 491 nm (0.75 × 10<sup>4</sup> M<sup>-1</sup> cm<sup>-1</sup>).

Elemental analysis: Anal. Calcd. for  $[\text{Ru}]\text{Cl}$ : C, 59.55%; H, 4.00%; N, 13.89%. Found: C, 57.72-57.73%; H, 4.18-4.19%; N, 12.11-12.36%.

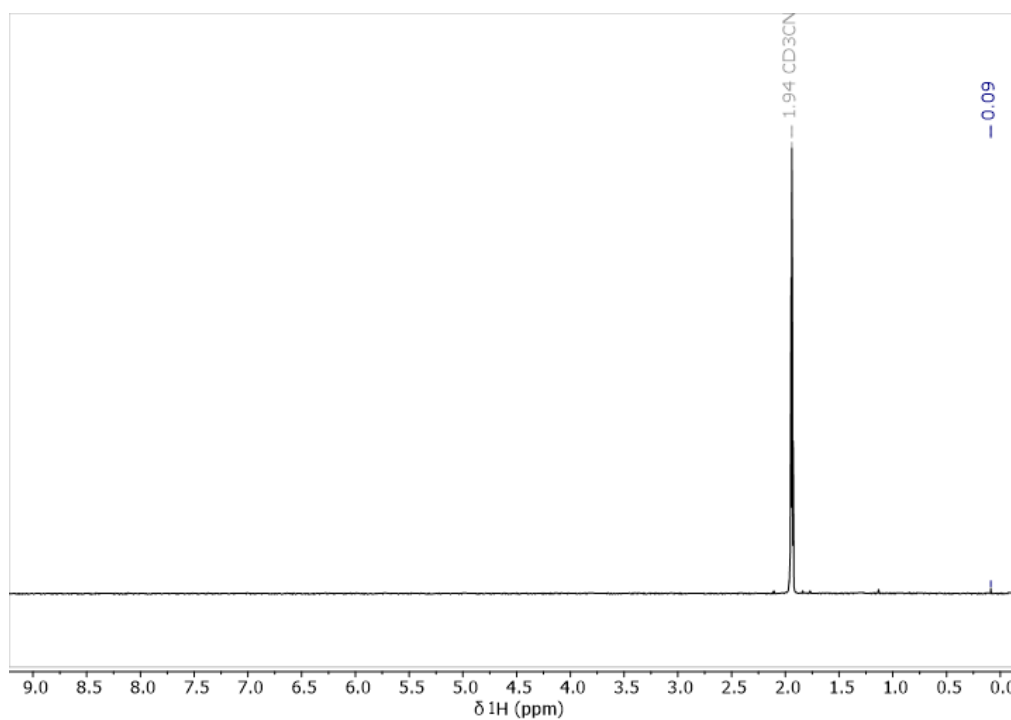

**Figure S3:**  $^1\text{H}$  NMR spectrum of  $[\text{Ru}]\text{Cl}$  recorded in  $\text{CD}_3\text{CN}$ . The resonance at 0.09 ppm is assigned to a small quantity of silicone grease resulting from the Soxhlet extraction.

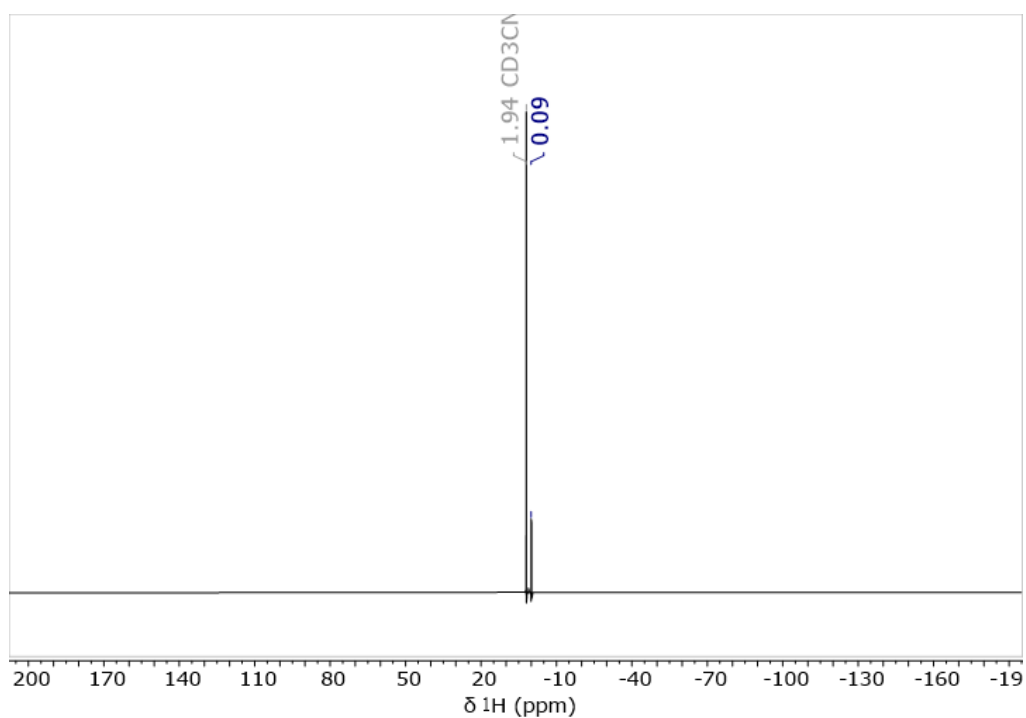

**Figure S4:**  $^1\text{H}$  NMR spectrum of  $[\text{Ru}]\text{Cl}$  recorded in  $\text{CD}_3\text{CN}$  using a 400 ppm sweep width.

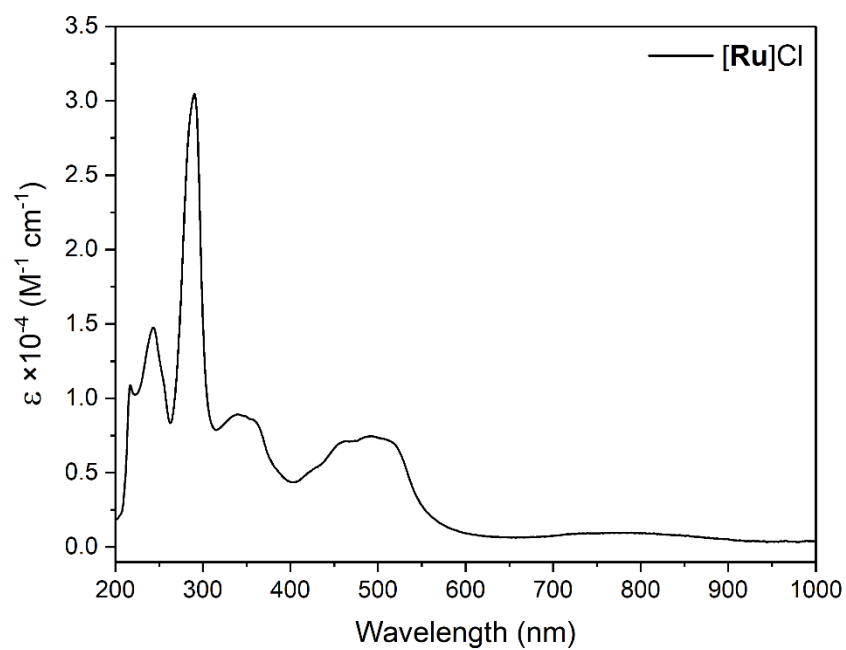

**Figure S5:** UV-vis absorption spectrum of [Ru]Cl, recorded on a 500  $\mu\text{M}$  solution in MeCN using a 1 mm path length cuvette.

### 2.3 Synthesis and characterisation of [Ru][BPh<sub>4</sub>]

A Schlenk flask was charged with [Ru]Cl<sub>2</sub> (931 mg, 1.45 mmol) and KC<sub>8</sub> (223 mg, 1.64 mmol), then THF (50 mL) was added with stirring. An immediate colour change from orange to pink-red was observed and the mixture was stirred for a further 2 hr. The suspension was transferred onto Na(BPh<sub>4</sub>) (497 mg, 1.45 mmol) and stirred for a further 1.5 hr. THF was removed *in vacuo* and the resulting dark red solids were transferred to a Soxhlet extraction cup. A Soxhlet extraction was performed, using 75 mL THF and refluxing for 44 hr. THF was removed from the filtrates, leaving a dark red solid, which was washed thoroughly with hexanes (3x 10 mL). The solids [Ru][BPh<sub>4</sub>] were then dried and weighed (697 mg, 0.784 mmol, 54% yield). Recrystallisation from a saturated MeCN solution at -35 °C provided analytically pure [Ru][BPh<sub>4</sub>]. The 1:1 ratio of Ru to the BPh<sub>4</sub> anion in [Ru][BPh<sub>4</sub>] was confirmed by NMR integration relative to a known quantity of [NEt<sub>4</sub>][PF<sub>6</sub>] as an internal standard.

<sup>1</sup>H NMR (CD<sub>3</sub>CN): δ = 6.80 (t, 7.2 Hz, 4H, BPh<sub>4</sub>), 6.96 (t, 7.4 Hz, 8H, BPh<sub>4</sub>), 7.2 ppm (t, br, 8H, BPh<sub>4</sub>).

<sup>13</sup>C NMR (CD<sub>3</sub>CN): δ = 135.9 (BPh<sub>4</sub>), 125.8 (BPh<sub>4</sub>), 122.1 ppm (BPh<sub>4</sub>).

<sup>11</sup>B NMR (CD<sub>3</sub>CN): δ = -5.8 ppm (s, BPh<sub>4</sub>).

UV-vis (CH<sub>3</sub>CN): λ<sub>max</sub> (ε) = 240 (3.23 x 10<sup>4</sup>), 292 (3.95 x 10<sup>4</sup>), 342 (1.84 x 10<sup>4</sup>), 497 nm (1.36 x 10<sup>4</sup> M<sup>-1</sup> cm<sup>-1</sup>).

Elemental analysis: Calcd. for [Ru][BPh<sub>4</sub>].MeCN: C, 72.33%; H, 5.09%; N, 10.54%. Found: C, 72.11-72.55%; H, 4.78-5.05%; N, 10.65-10.73%.

Mass Spectrometry: Predicted for [Ru]<sup>+</sup> (C<sub>30</sub> H<sub>24</sub> N<sub>6</sub> Ru), *m/z* = 570.1106; Found, *m/z* = 570.1167.

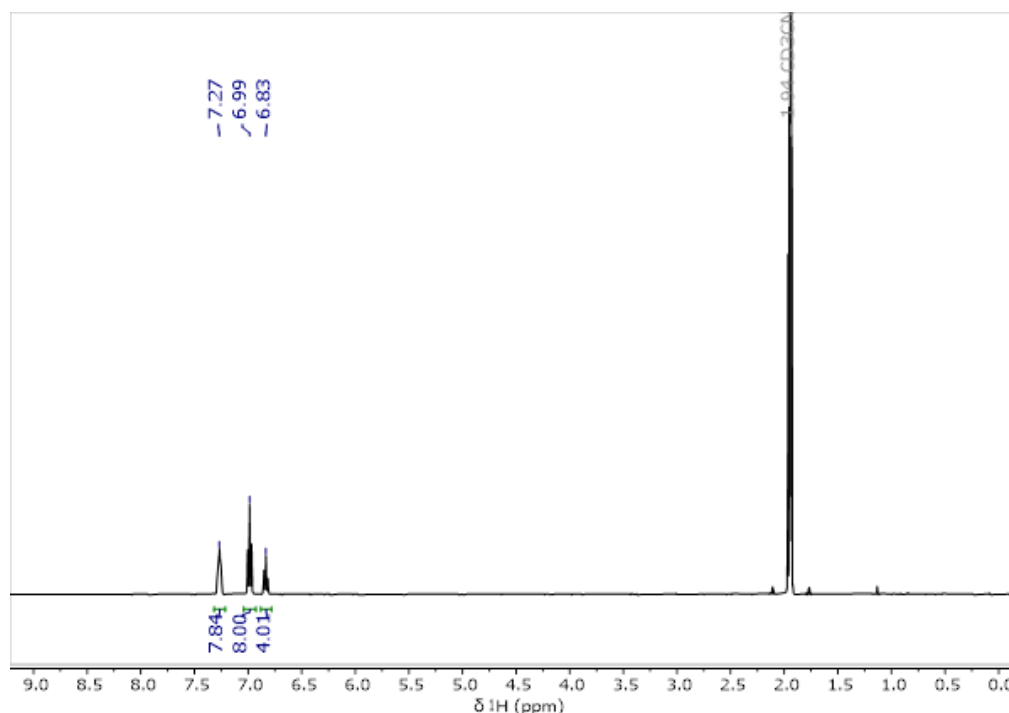

Figure S6: <sup>1</sup>H NMR spectrum of [Ru][BPh<sub>4</sub>] recorded in CD<sub>3</sub>CN. Assignment: [BPh<sub>4</sub>]<sup>-</sup>, δ = 7.27, 6.99 and 6.83 ppm.



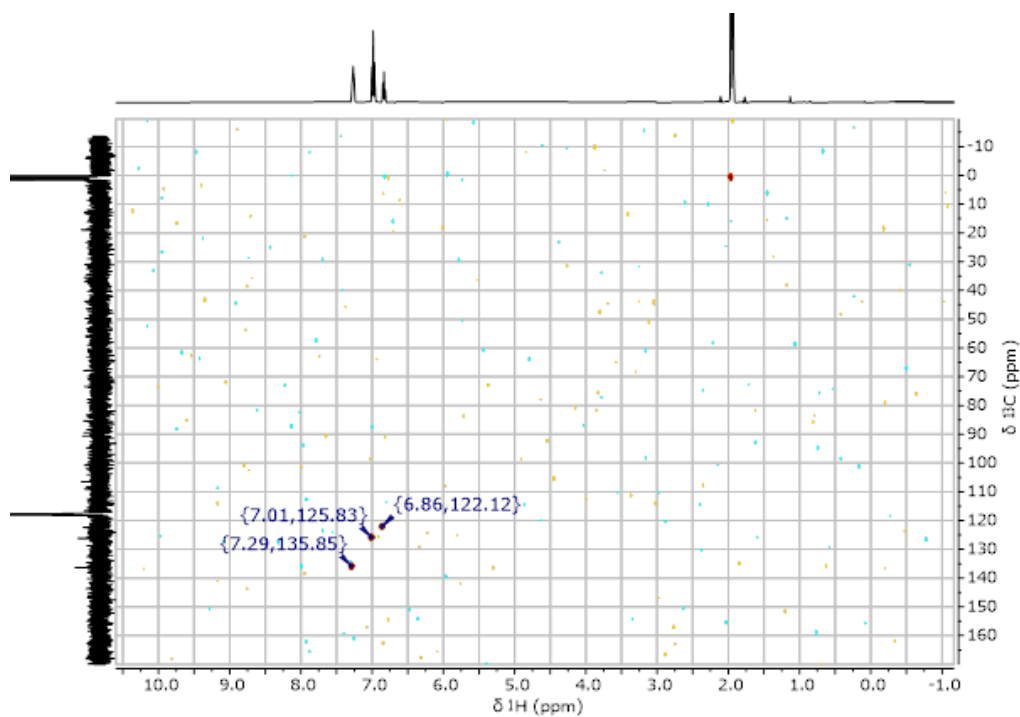

Figure S7:  $^1\text{H}/^{13}\text{C}$  HSQC NMR spectrum of  $[\text{Ru}][\text{BPh}_4]$  recorded in  $\text{CD}_3\text{CN}$ . Assignment ( $^{13}\text{C}$ ):  $[\text{BPh}_4]^-$ ,  $\delta = 135.9$ ,  $125.8$  and  $122.1$  ppm;  $\text{CD}_3\text{CN}$ ,  $\delta = 117.8$  and  $0.9$  ppm.

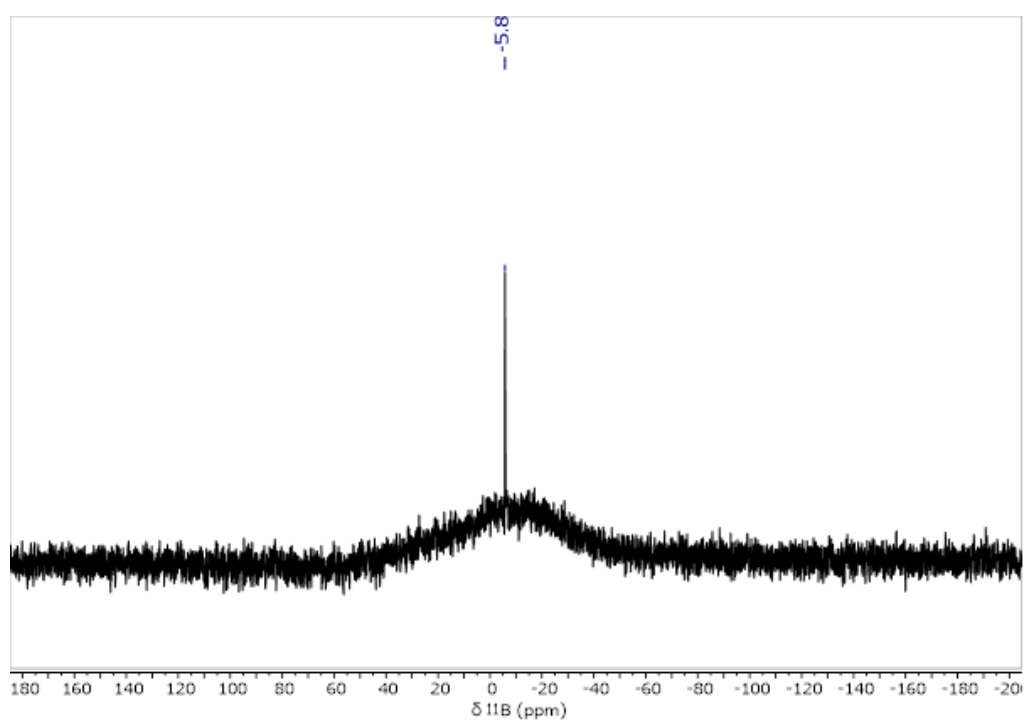

Figure S8:  $^{11}\text{B}\{^1\text{H}\}$  NMR spectrum of  $[\text{Ru}][\text{BPh}_4]$  recorded in  $\text{CD}_3\text{CN}$ . Assignment:  $[\text{BPh}_4]^-$ ,  $\delta = 5.8$  ppm.

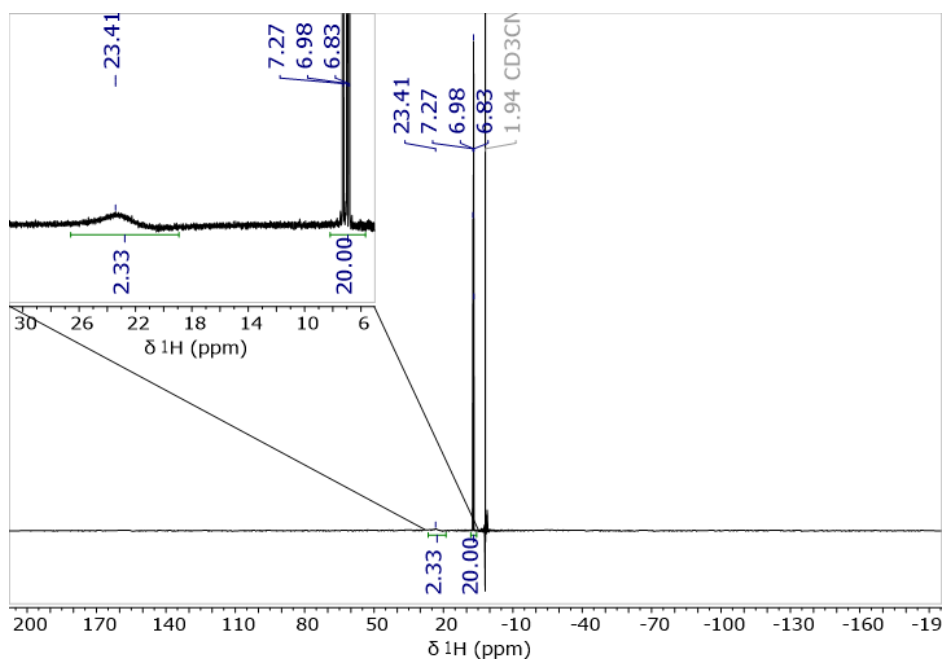

Figure S9:  $^1\text{H}$  NMR spectrum of  $[\text{Ru}][\text{BPh}_4]$ , recorded in  $\text{CD}_3\text{CN}$  using a 400 ppm sweep width. Assignment:  $[\text{BPh}_4]^-$ ,  $\delta = 7.27$ ,  $6.98$  and  $6.83$  ppm;  $(\text{bipy})^-$ ,  $\delta = 23.41$  ppm. Inset is an expansion showing the resonance at  $\delta = 23.41$  ppm more clearly.

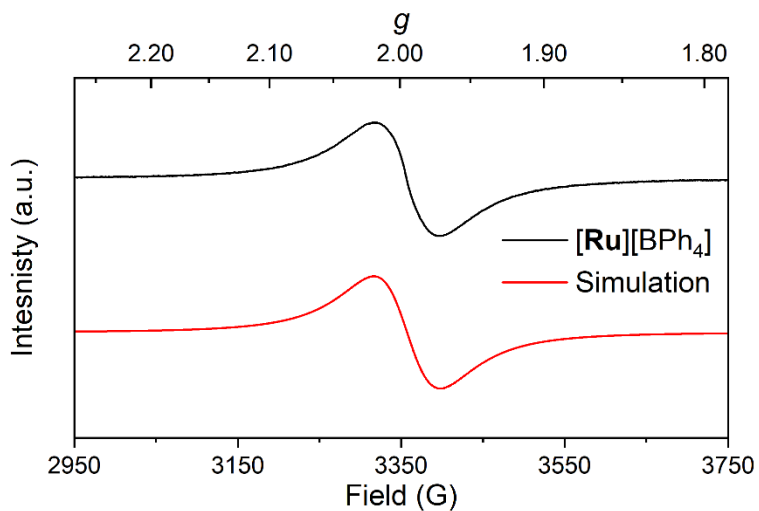

Figure S10: X-band EPR spectrum of  $[\text{Ru}][\text{BPh}_4]$ , recorded on a 2 mM MeCN solution at room temperature. Microwave frequency 9.3722 GHz, power 20 mW, simulated with  $g = 2.002$ .

### 3 Reactivity

All the following reactions were performed in NMR tubes, using the same volume and using identical concentrations of substrates and photocatalysts, unless noted otherwise. The chosen concentration of  $[\text{Ru}][\text{BPh}_4]$  and  $[\text{Ru}]\text{Cl}_2$  used was 2.5 mM, and substrates (PhCl, PhBr and PhI) and radical traps ( $\text{P}(\text{OMe})_3$ ,  $\text{B}_2\text{pin}_2$ ) were used at 50 mM concentrations. All reactions were performed in acetonitrile, and where appropriate 1 eq. of an internal standard ( $\text{Ph}_3\text{PO}$ ) was added for the purposes of quantifying the products formed.

We note that ethylamine can be identified in many of our  $^1\text{H}$  NMR spectra ( $\delta = 2.32, 1.17$  ppm). This was present in the  $\text{H}_3$ -acetonitrile solvent as purchased from several suppliers, and is a common impurity typically present when MeCN is used as a solvent. We do not believe it is relevant to the observed reactivity as its concentration was significantly lower (*ca.* 20 times lower) than the substrates used, and this concentration did not appear to change over the course of the experiments.

Quantification of  $[\text{Ru}]^{2+}$  reformed during a reaction was achieved by  $^1\text{H}$  NMR integration against the  $[\text{BPh}_4]^-$  resonances. Quantification in  $^{31}\text{P}$  NMR spectra was achieved using an inverse-gated proton decoupled experiment. We recently confirmed the accuracy of this method for our system by integration of solutions containing known, similar concentrations of the predicted product and the internal standard.<sup>2</sup>

#### 3.1 Photostability studies

We found  $[\text{Ru}]\text{Cl}$  and  $[\text{Ru}][\text{BPh}_4]$  to be stable in dry, oxygen-free solvents for at least a week at room temperature. To determine the photostability of  $[\text{Ru}][\text{BPh}_4]$ , solutions of  $[\text{Ru}][\text{BPh}_4]$  were irradiated using light of 365, 455 or 530 nm for 16 h (see Figure S11 to Figure S13). Under irradiation at 365 and 455 nm, resonances consistent with the oxidised  $[\text{Ru}(\text{bipy})_3]^{2+}$  were observed in moderate quantities. However, under irradiation at 530 nm, only a very small quantity of  $[\text{Ru}(\text{bipy})_3]^{2+}$  was observed (*ca.* 4%). The UV-vis absorption spectra of these reactions show the same trend, with 530 nm light resulting in very minor changes compared to  $[\text{Ru}][\text{BPh}_4]$  (Figure S14). Over a 1 h experiment, no  $[\text{Ru}(\text{bipy})_3]^{2+}$  was detected by  $^1\text{H}$  NMR following irradiation by 530 nm light (see Figure S15). In order to establish whether  $[\text{Ru}][\text{BPh}_4]$  reacted with the radical trap  $\text{P}(\text{OMe})_3$  in isolation, a solution containing  $[\text{Ru}][\text{BPh}_4]$  and  $\text{P}(\text{OMe})_3$  was irradiated at 530 nm for 1 h (see Figure S16 and Figure S17). No species other than starting materials were observed in the  $^1\text{H}$  or  $^{31}\text{P}\{^1\text{H}\}$  NMR spectra after this time. Likewise, the UV-vis spectrum of this solution showed no significant changes from  $[\text{Ru}][\text{BPh}_4]$  (Figure S18).

We also investigated the photostability of  $[\text{Ru}]\text{Cl}_2$  under our experimental conditions by irradiating solutions of  $[\text{Ru}]\text{Cl}_2$  using light of either 455 or 530 nm (see Figure S19 and Figure S20). It was clear from these experiments that significant decomposition had occurred in both cases, but that significantly greater degradation occurred under irradiation by 455 nm than 530 nm light. Solutions of  $[\text{Ru}]\text{Cl}_2$  with radical traps  $\text{P}(\text{OMe})_3$  and  $\text{B}_2\text{pin}_2$  were also studied under irradiation (see Figure S21 and Figure S22). With both  $\text{P}(\text{OMe})_3$  and  $\text{B}_2\text{pin}_2$ ,  $[\text{Ru}]\text{Cl}_2$  was consumed and several new resonances were observed to grow in in the aromatic region, similarly to the degradation observed in absence of the radical traps. However, in the case of  $\text{P}(\text{OMe})_3$  several new resonances were also observed which appeared to arise from reaction between  $[\text{Ru}]\text{Cl}_2$  and  $\text{P}(\text{OMe})_3$ . We presume this to be due to a reduction of  $[\text{Ru}]\text{Cl}_2$ . In light of this, we chose to avoid  $\text{P}(\text{OMe})_3$  and use  $\text{B}_2\text{pin}_2$  as a radical trap for reactions of  $[\text{Ru}]\text{Cl}_2$ .

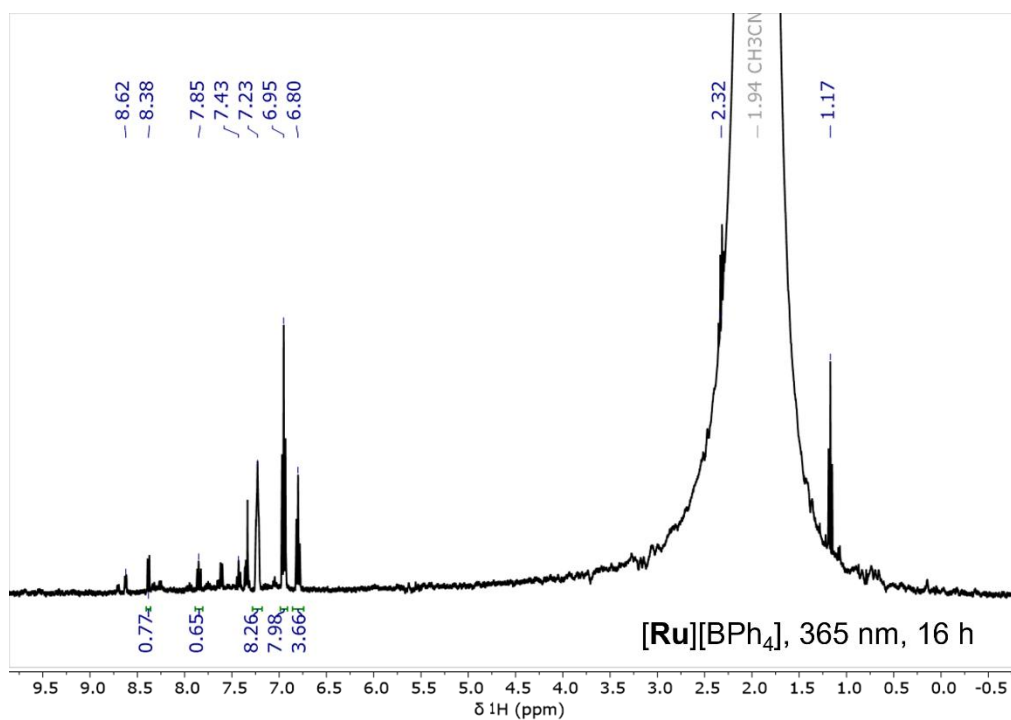

**Figure S11:** <sup>1</sup>H NMR spectrum of [Ru][BPh<sub>4</sub>] following irradiation by 365 nm light for 16 h. Assignments: [BPh<sub>4</sub>]<sup>-</sup>, δ = 7.23, 6.95 and 6.80 ppm; [Ru(bipy)<sub>3</sub>]<sup>2+</sup>, δ = 8.62, 8.38, 7.85 and 7.43 ppm.

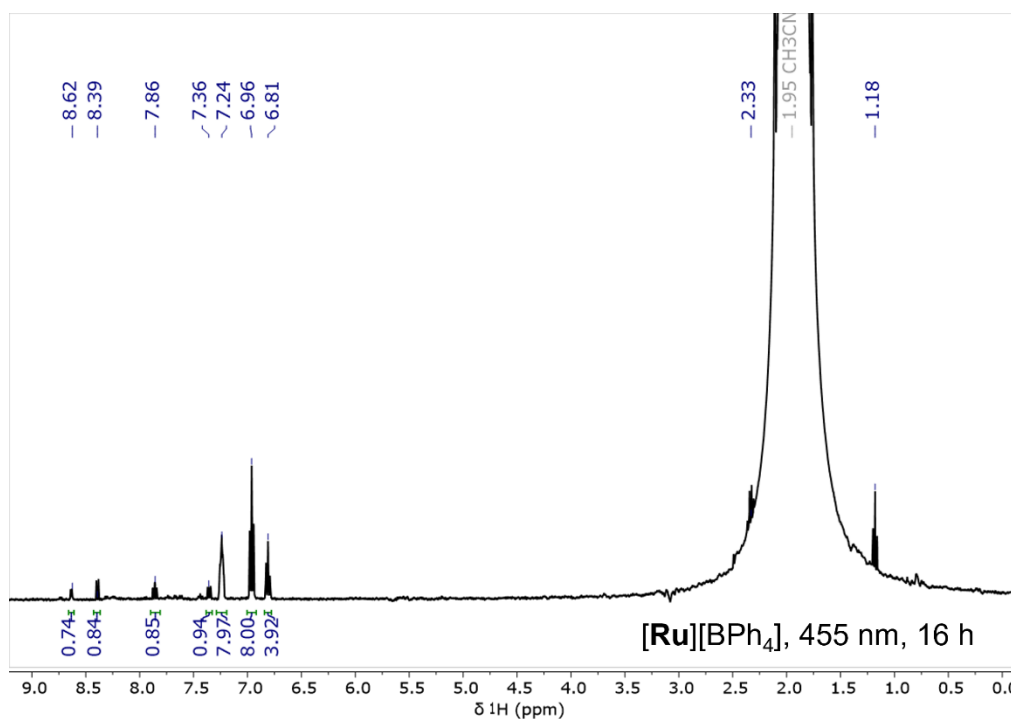

**Figure S12:** <sup>1</sup>H NMR spectrum of [Ru][BPh<sub>4</sub>] following irradiation by 455 nm light for 16 h. Assignments: [BPh<sub>4</sub>]<sup>-</sup>, δ = 7.24, 6.96 and 6.81 ppm; [Ru(bipy)<sub>3</sub>]<sup>2+</sup>, δ = 8.62, 8.39, 7.86 and 7.36 ppm.

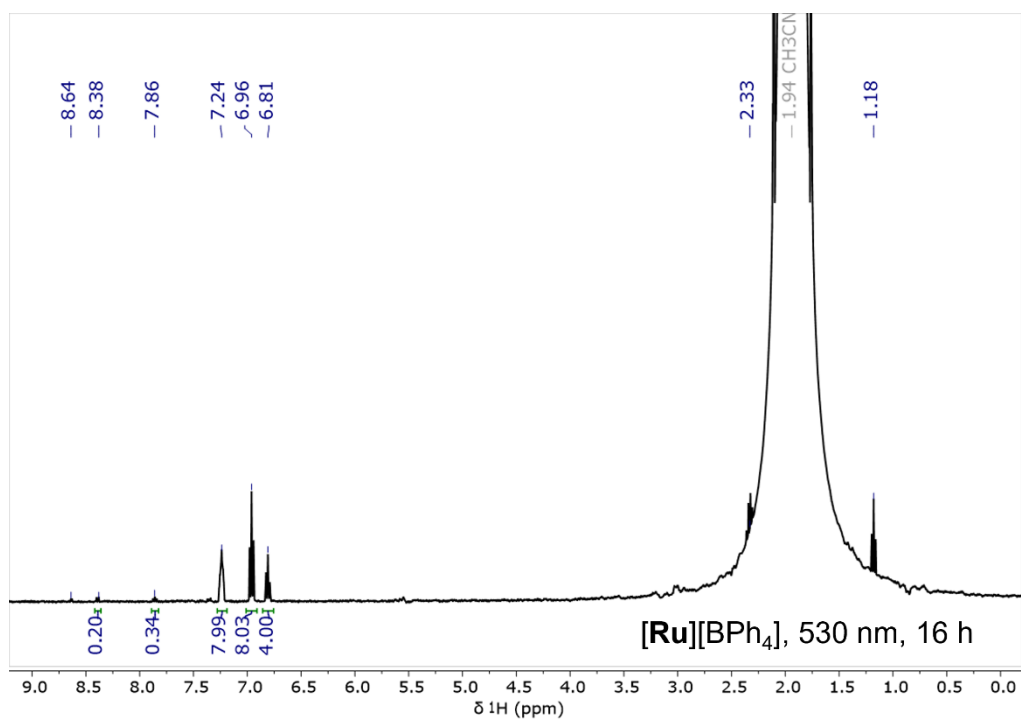

Figure S13:  $^1\text{H}$  NMR spectrum of  $[\text{Ru}][\text{BPh}_4]$  following irradiation by 530 nm light for 16 h. Assignments:  $[\text{BPh}_4]^-$ ,  $\delta = 7.24, 6.96$  and  $6.81$  ppm;  $[\text{Ru}(\text{bipy})_3]^{2+}$ ,  $\delta = 8.64, 8.38$  and  $7.86$  ppm.

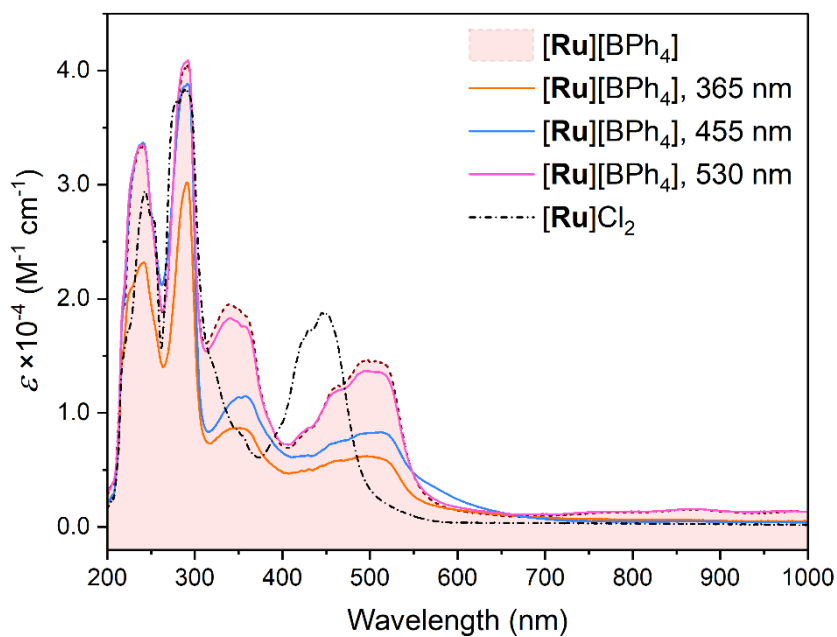

Figure S14: UV-vis absorption spectra of  $[\text{Ru}][\text{BPh}_4]$ , before and following irradiation by light of 365, 455 or 530 nm for 16 h. Irradiation was performed at 2.5 mM concentration. The solution was then diluted to 500  $\mu\text{M}$  concentration for the UV-vis measurement. Also included is the absorption spectrum of  $[\text{Ru}]\text{Cl}_2$  for comparison.

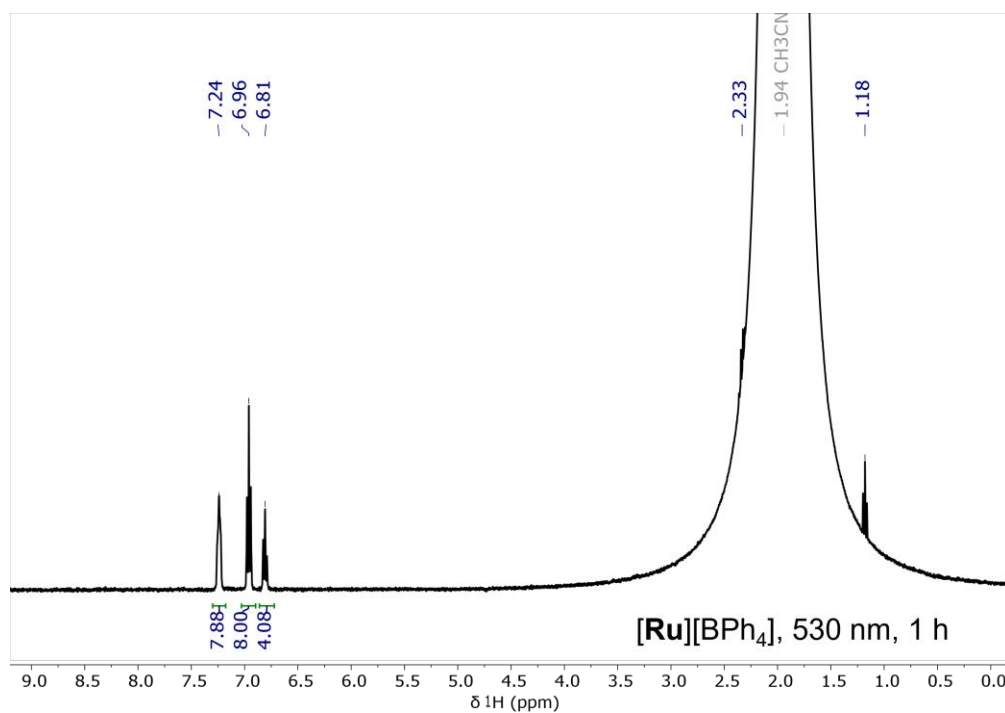

Figure S15: <sup>1</sup>H NMR spectrum of [Ru][BPh<sub>4</sub>] following irradiation by 530 nm light for 1 h. Assignments: [BPh<sub>4</sub>]<sup>-</sup>, δ = 7.24, 6.96 and 6.81 ppm.

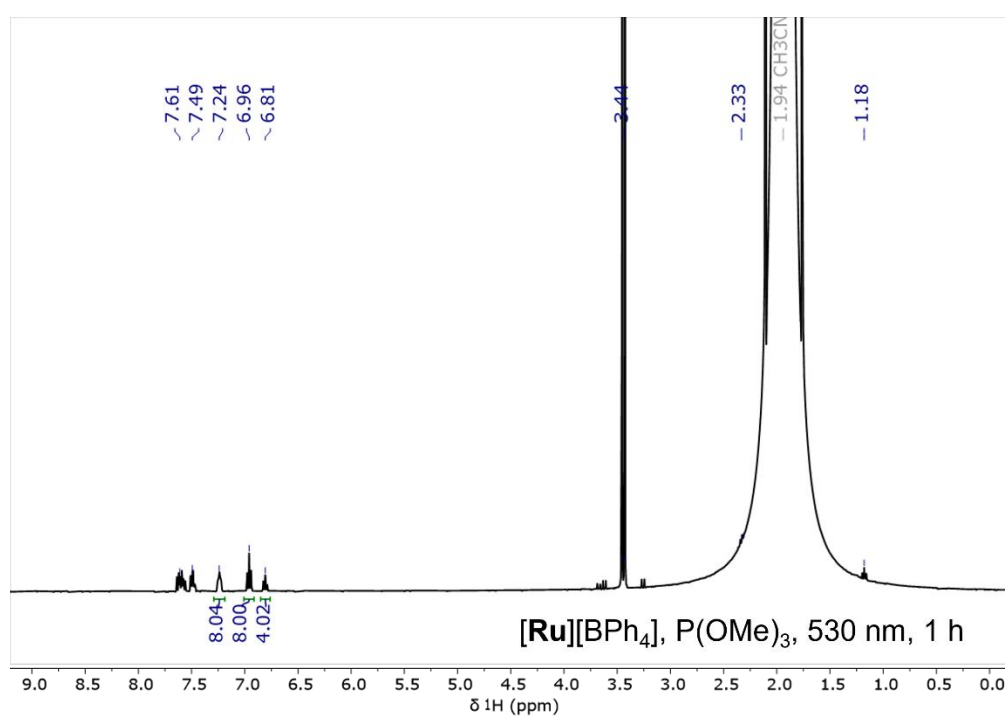

Figure S16: <sup>1</sup>H NMR spectrum of the reaction between [Ru][BPh<sub>4</sub>] and P(OMe)<sub>3</sub> following irradiation by 530 nm light for 1 h. Ph<sub>3</sub>PO was added after irradiation. Assignments: [BPh<sub>4</sub>]<sup>-</sup>, δ = 7.24, 6.96 and 6.81 ppm; Ph<sub>3</sub>PO, δ = 7.61-7.49 ppm; P(OMe)<sub>3</sub>, δ = 3.44 ppm.

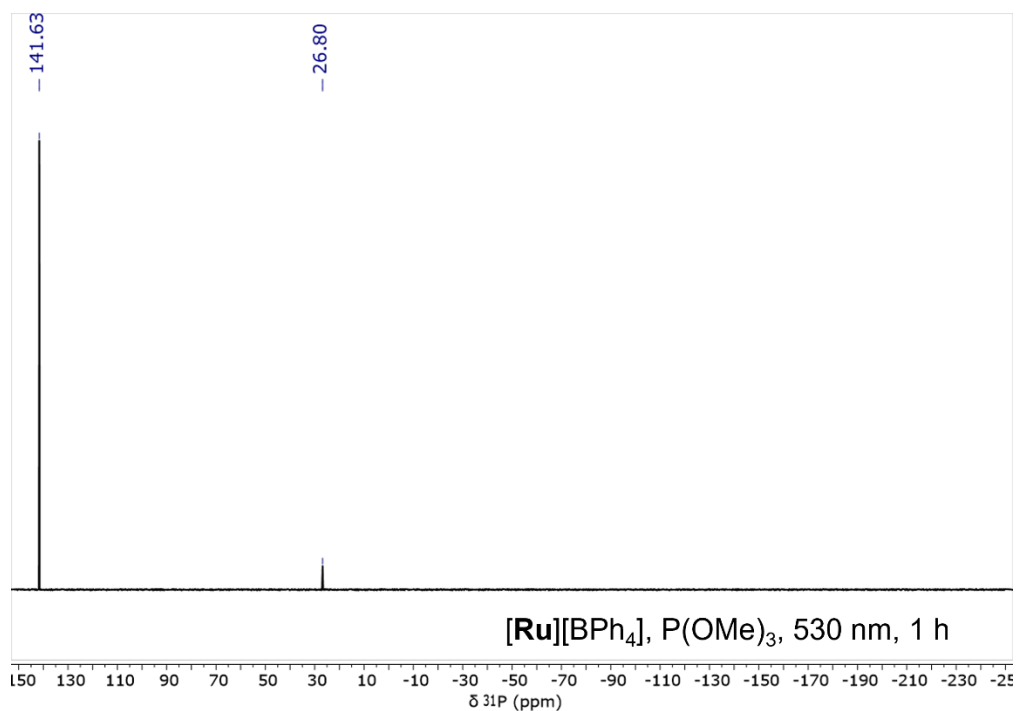

Figure S17:  $^{31}\text{P}\{^1\text{H}\}$  NMR spectrum of the reaction between  $[\text{Ru}][\text{BPh}_4]$  and  $\text{P}(\text{OMe})_3$  following irradiation by 530 nm light for 1 h.  $\text{Ph}_3\text{PO}$  was added after irradiation. Assignments:  $\text{P}(\text{OMe})_3$ ,  $\delta = 141.63$  ppm;  $\text{Ph}_3\text{PO}$ ,  $\delta = 26.80$  ppm.

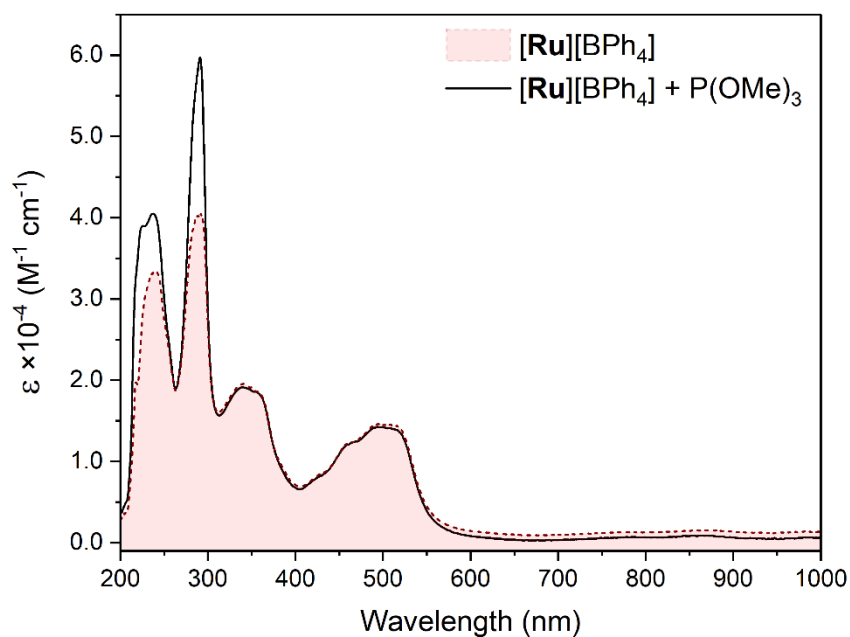

Figure S18: UV-vis absorption spectra of  $[\text{Ru}][\text{BPh}_4]$  and  $\text{P}(\text{OMe})_3$  following irradiation by light of 530 nm for 1 h. The concentration of  $[\text{Ru}][\text{BPh}_4]$  was  $500 \mu\text{M}$ , in MeCN. The spectrum of  $[\text{Ru}][\text{BPh}_4]$  is included for comparison.

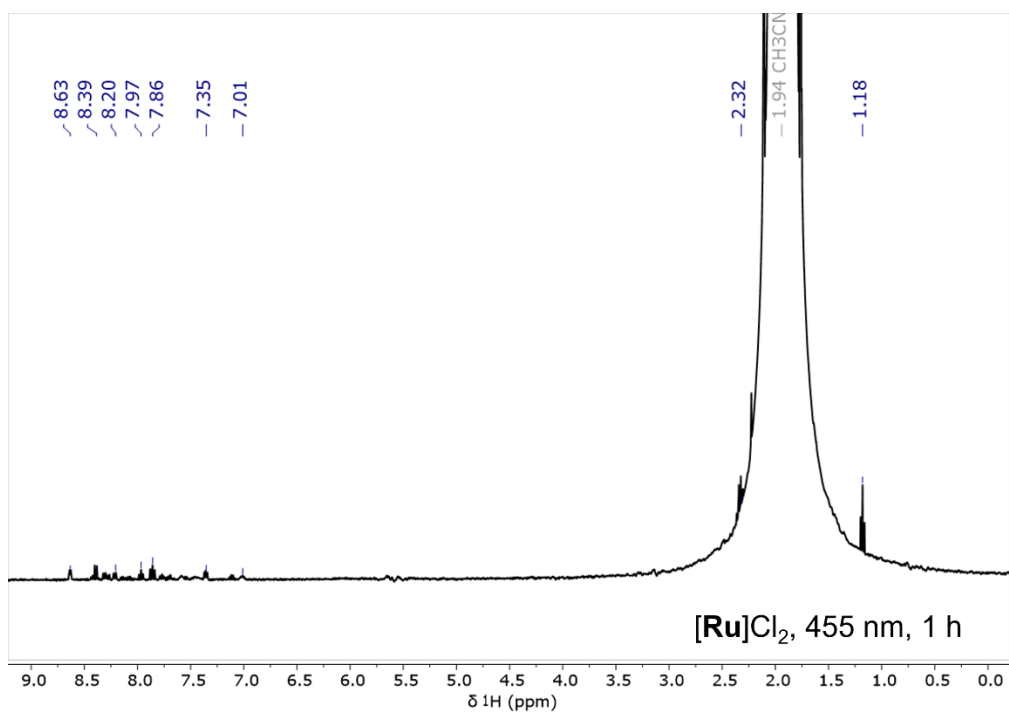

Figure S19: <sup>1</sup>H NMR spectrum of [Ru]Cl<sub>2</sub> following irradiation by 455 nm light for 1 h.

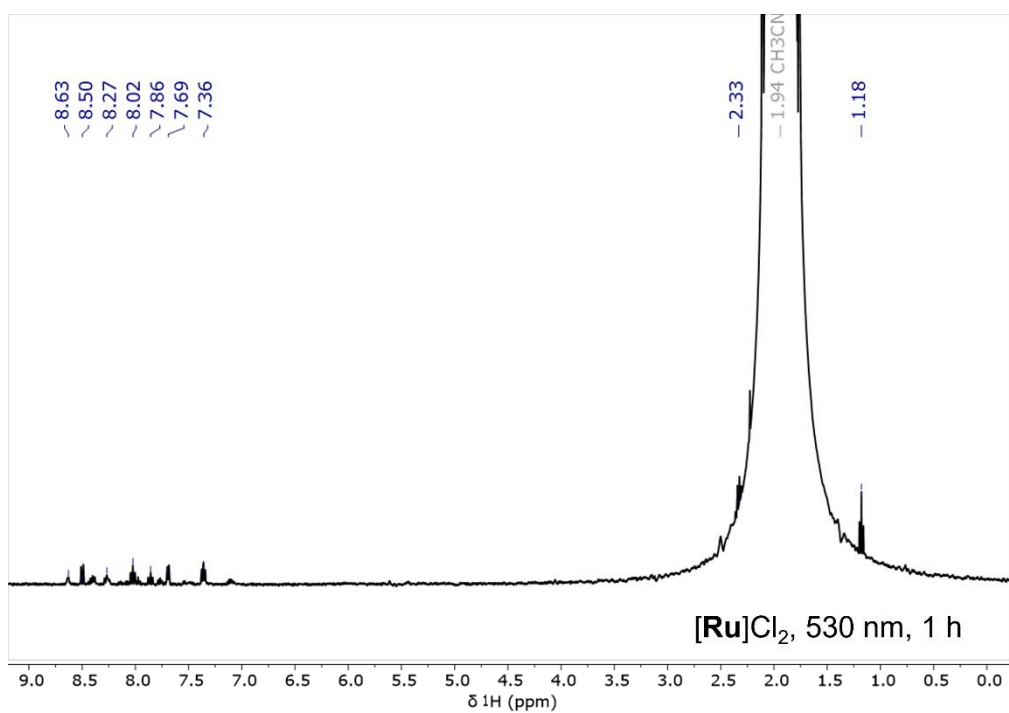

Figure S20: <sup>1</sup>H NMR spectrum of [Ru]Cl<sub>2</sub> following irradiation by 530 nm light for 1 h.



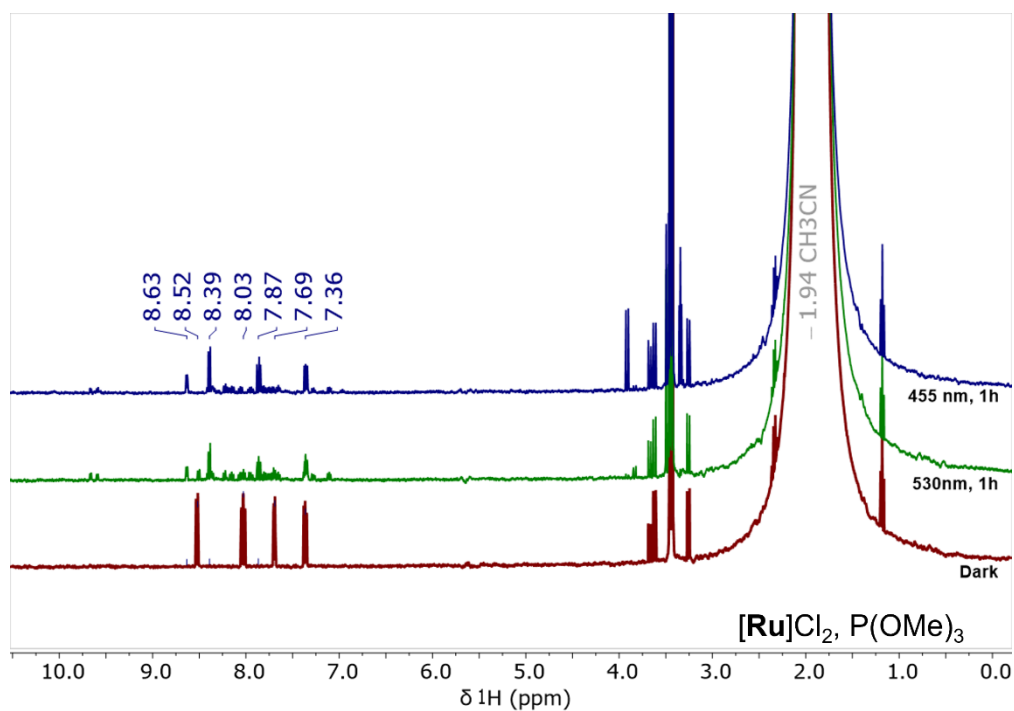

Figure S21:  $^1\text{H}$  NMR spectra of the reactions between  $[\text{Ru}]\text{Cl}_2$  and  $\text{P}(\text{OMe})_3$  in the dark, and following irradiation by 530 or 455 nm light for 1 h. Assignments:  $[\text{Ru}]\text{Cl}_2$ ,  $\delta = 8.52, 8.03, 7.69$  and  $7.36$  ppm; primary product,  $\delta = 8.63, 8.39, 7.87$  and  $7.36$  ppm.

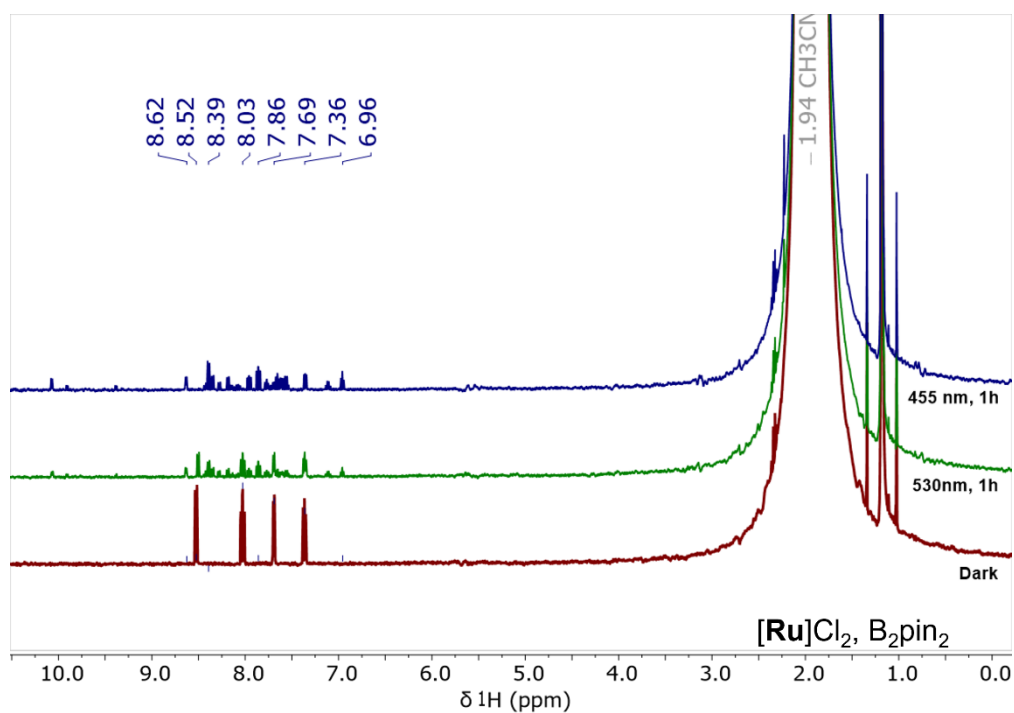

Figure S22:  $^1\text{H}$  NMR spectra of the reactions between  $[\text{Ru}]\text{Cl}_2$  and  $\text{B}_2\text{pin}_2$  in the dark, and following irradiation by 530 or 455 nm light for 1 h. Assignments:  $[\text{Ru}]\text{Cl}_2$ ,  $\delta = 8.52, 8.03, 7.69$  and  $7.36$  ppm; primary products,  $\delta = 8.62, 8.39, 7.86$  and  $6.96$  ppm.

### 3.2 Reduction of aryl halides by [Ru][BPh<sub>4</sub>]

To determine any ground-state reactivity, solutions of [Ru][BPh<sub>4</sub>] with PhCl, PhBr or PhI were left in the dark for 1 h (see Figure S23 to Figure S25). Only the reaction containing PhI resulted in any production of [Ru(bipy)<sub>3</sub>]<sup>2+</sup>.

To determine the excited state reactivity, solutions of [Ru][BPh<sub>4</sub>] with PhCl, PhBr or PhI were irradiated for 1 h with light of 530 nm (see Figure S26 to Figure S28). Reactions containing PhBr and PhI both resulted in resonances consistent with oxidation of [Ru][BPh<sub>4</sub>] to [Ru(bipy)<sub>3</sub>]<sup>2+</sup>.

To confirm that reduction of the aryl halide was responsible for the oxidation of [Ru]<sup>+</sup> to [Ru]<sup>2+</sup>, P(OMe)<sub>3</sub> was included to react with the predicted phenyl radicals that would be generated by this reaction. Solutions of [Ru][BPh<sub>4</sub>] with PhCl, PhBr or PhI and P(OMe)<sub>3</sub> were irradiated for 1 h with light of 530 nm (see Figure S29 to Figure S36). In all three cases, the phenyl radical trapping product PhPO(OMe)<sub>2</sub> was generated. The highest yield was 60%, for the reaction of [Ru][BPh<sub>4</sub>] with PhBr. When this reaction was instead run for 16 h, a product yield of 205% was obtained. We presume this high yield to be due to reduction of [Ru(bipy)<sub>3</sub>]<sup>2+</sup> back to [Ru(bipy)<sub>3</sub>]<sup>+</sup> by PhP<sup>\*</sup>(OMe)<sub>3</sub>, the initial product of phenyl radical trapping by P(OMe)<sub>3</sub>. We recently reported similar observations in photoreactions of organic PCs.<sup>2</sup> Shown in Figures Figure S33 Figure S34 are the <sup>1</sup>H and <sup>31</sup>P NMR spectra of PhPO(OMe)<sub>2</sub> respectively, where an expansion is shown of the aromatic region of the <sup>1</sup>H NMR spectrum for ease of comparison.

In order to further probe the reactivity, solutions of [Ru][BPh<sub>4</sub>] were reacted with MeO(C<sub>6</sub>H<sub>4</sub>)Cl and MeO<sub>2</sub>C(C<sub>6</sub>H<sub>4</sub>)Cl and P(OMe)<sub>3</sub> under 530 nm irradiation, also for 1 h (see Figure S37 to Figure S40). Where MeO(C<sub>6</sub>H<sub>4</sub>)Cl contains an electron donating group making it more challenging to reduce than the parent PhCl, MeO<sub>2</sub>C(C<sub>6</sub>H<sub>4</sub>)Cl contains an electron withdrawing group making it easier to reduce. Accordingly, the yield of the phosphonate product was lower for MeO(C<sub>6</sub>H<sub>4</sub>)Cl (4%) than for PhCl (12%), while for MeO<sub>2</sub>C(C<sub>6</sub>H<sub>4</sub>)Cl it was higher (17%).

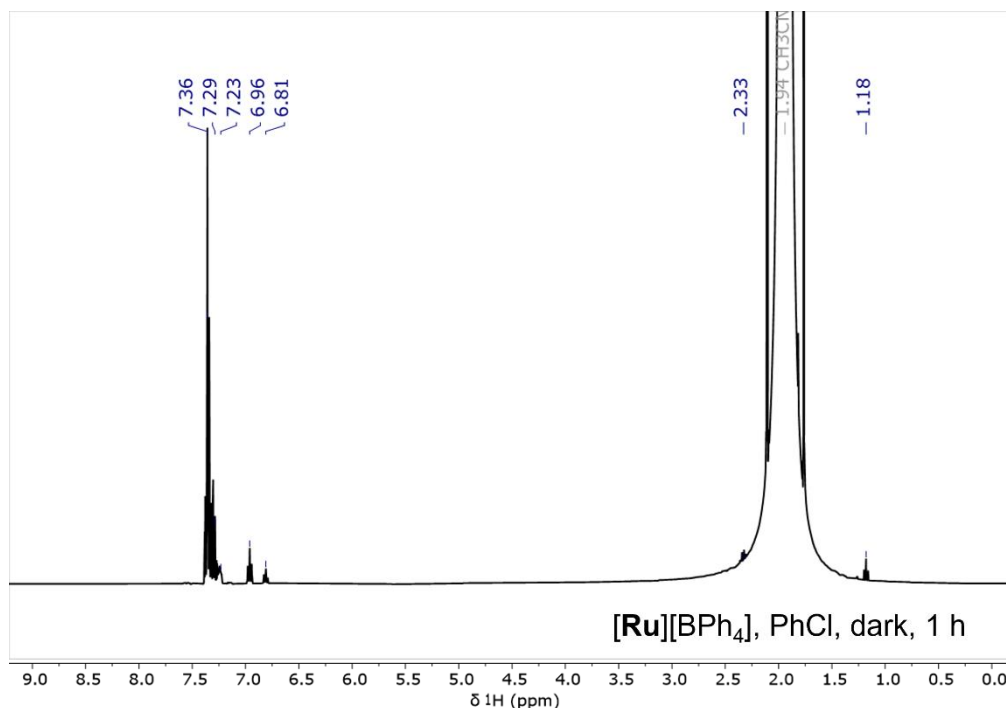

**Figure S23:** <sup>1</sup>H NMR spectrum of the reaction between [Ru][BPh<sub>4</sub>] and PhCl after being left in the dark for 1 h. Assignments: [BPh<sub>4</sub>]<sup>-</sup>, δ = 7.23, 6.96 and 6.81 ppm; PhCl, 7.36-7.29 ppm.

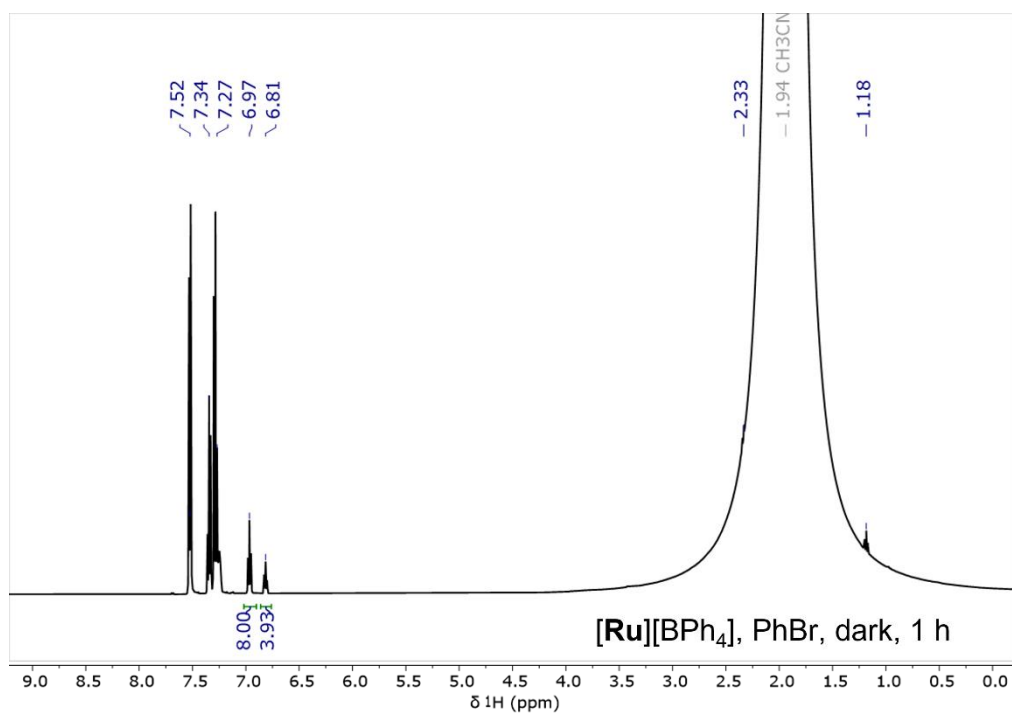

**Figure S24:**  $^1\text{H}$  NMR spectrum of the reaction between  $[\text{Ru}][\text{BPh}_4]$  and PhBr after being left in the dark for 1 h. Assignments:  $[\text{BPh}_4]^-$ ,  $\delta = 6.97$  and  $6.81$  ppm; PhBr,  $7.52$ ,  $7.34$ - $7.27$  ppm.

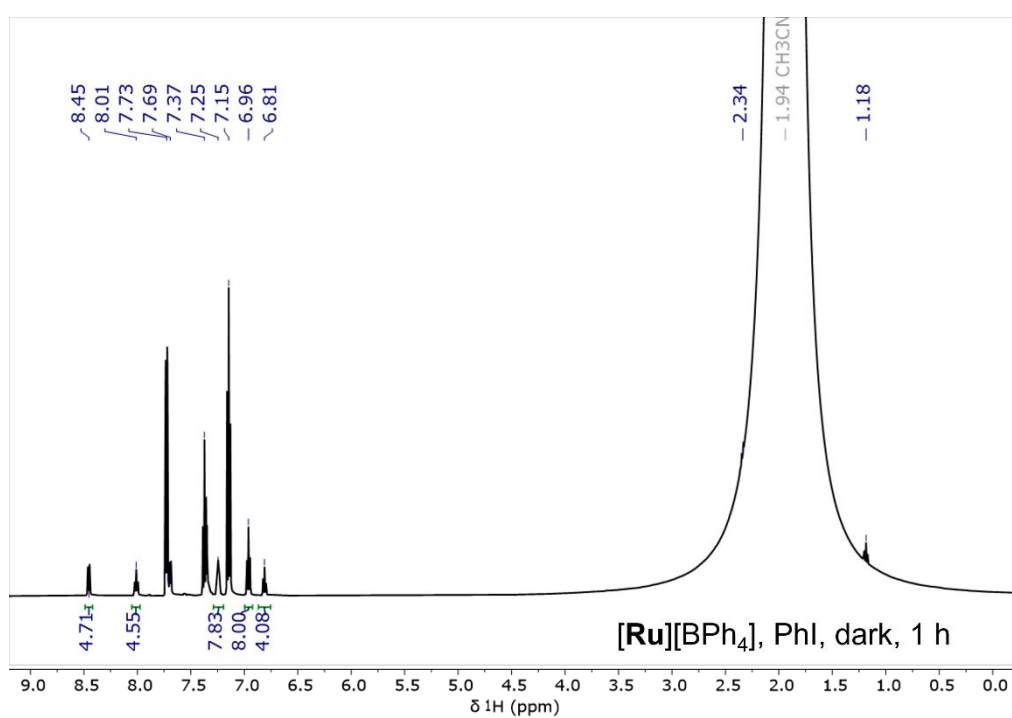

**Figure S25:**  $^1\text{H}$  NMR spectrum of the reaction between  $[\text{Ru}][\text{BPh}_4]$  and PhI after being left in the dark for 1 h. Assignments:  $[\text{BPh}_4]^-$ ,  $\delta = 7.25$ ,  $6.96$  and  $6.81$  ppm; PhI,  $\delta = 7.73$ ,  $7.37$  and  $7.15$  ppm;  $[\text{Ru}(\text{bipy})_3]^{2+}$ ,  $\delta = 8.45$ ,  $8.01$  and  $7.69$  ppm.  $[\text{Ru}(\text{bipy})_3]^{2+}$  recovery: 77%.

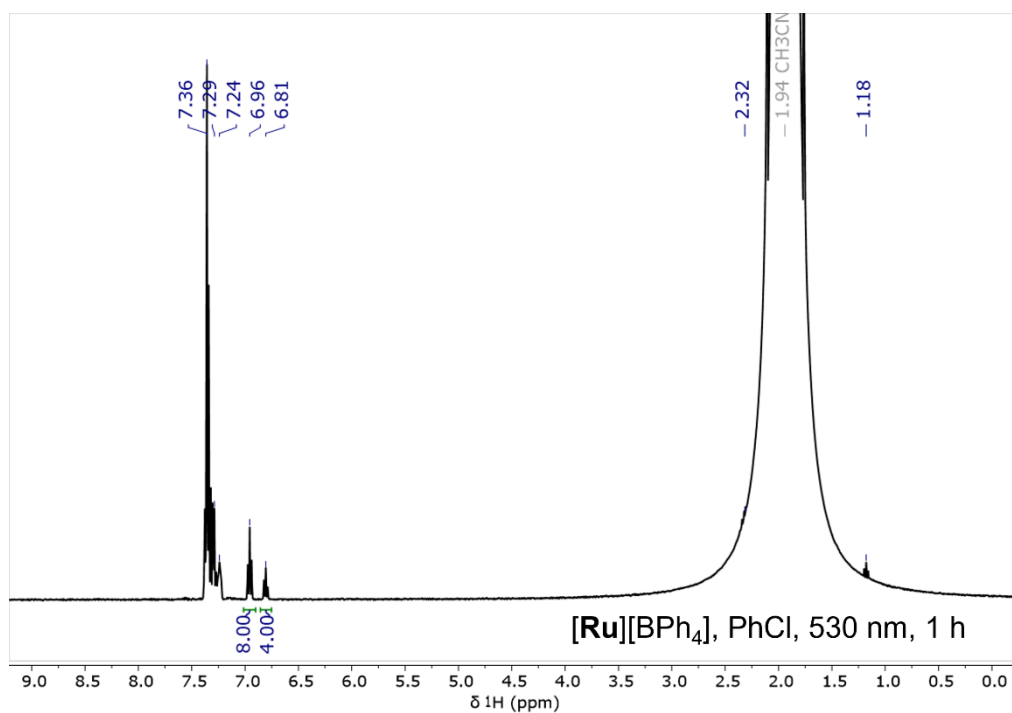

Figure S26: <sup>1</sup>H NMR spectrum of the reaction between [Ru][BPh<sub>4</sub>] and PhCl following irradiation at 530 nm for 1 h. Assignments: [BPh<sub>4</sub>]<sup>-</sup>, δ = 7.24, 6.96 and 6.81 ppm; PhCl, 7.36-7.29 ppm.

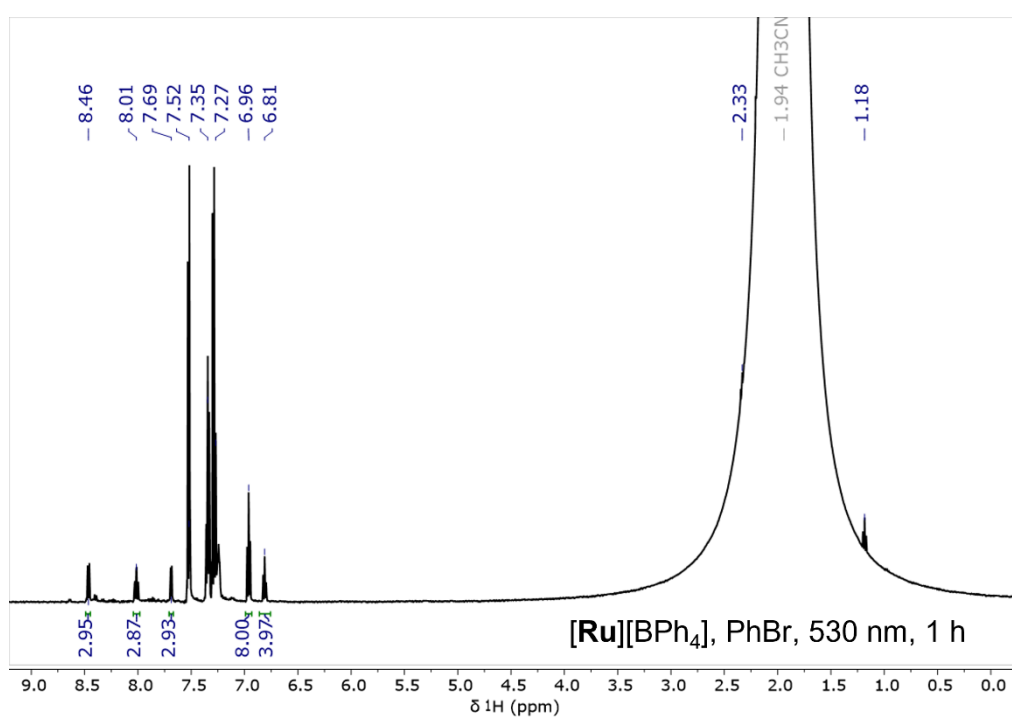

Figure S27: <sup>1</sup>H NMR spectrum of the reaction between [Ru][BPh<sub>4</sub>] and PhBr following irradiation at 530 nm for 1 h. Assignments: [BPh<sub>4</sub>]<sup>-</sup>, δ = 6.96 and 6.81 ppm; PhBr, δ = 7.52, 7.35-7.27 ppm; [Ru(bipy)<sub>3</sub>]<sup>2+</sup>, δ = 8.46, 8.01 and 7.69 ppm. [Ru(bipy)<sub>3</sub>]<sup>2+</sup> recovery: 49%.

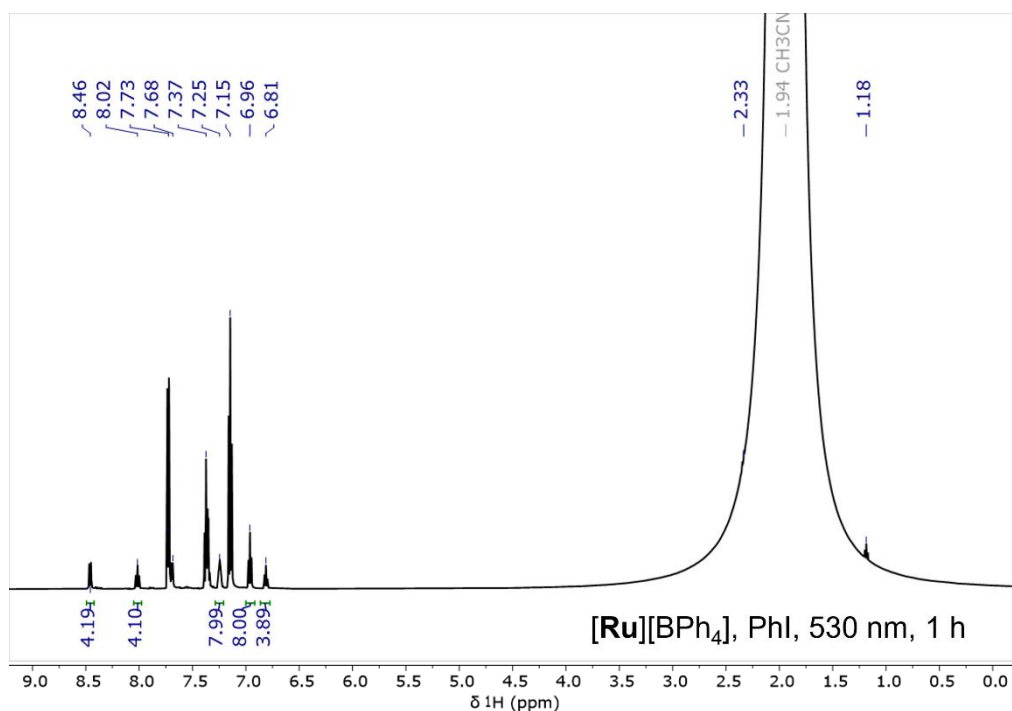

**Figure S28:**  $^1\text{H}$  NMR spectrum of the reaction between  $[\text{Ru}][\text{BPh}_4]$  and PhI following irradiation at 530 nm for 1 h. Assignments:  $[\text{BPh}_4]^-$ ,  $\delta = 7.25, 6.96$  and  $6.81$  ppm; PhI,  $\delta = 7.73, 7.37$  and  $7.15$  ppm;  $[\text{Ru}(\text{bipy})_3]^{2+}$ ,  $8.46, 8.02$  and  $7.68$  ppm.  $[\text{Ru}(\text{bipy})_3]^{2+}$  recovery: 69%.

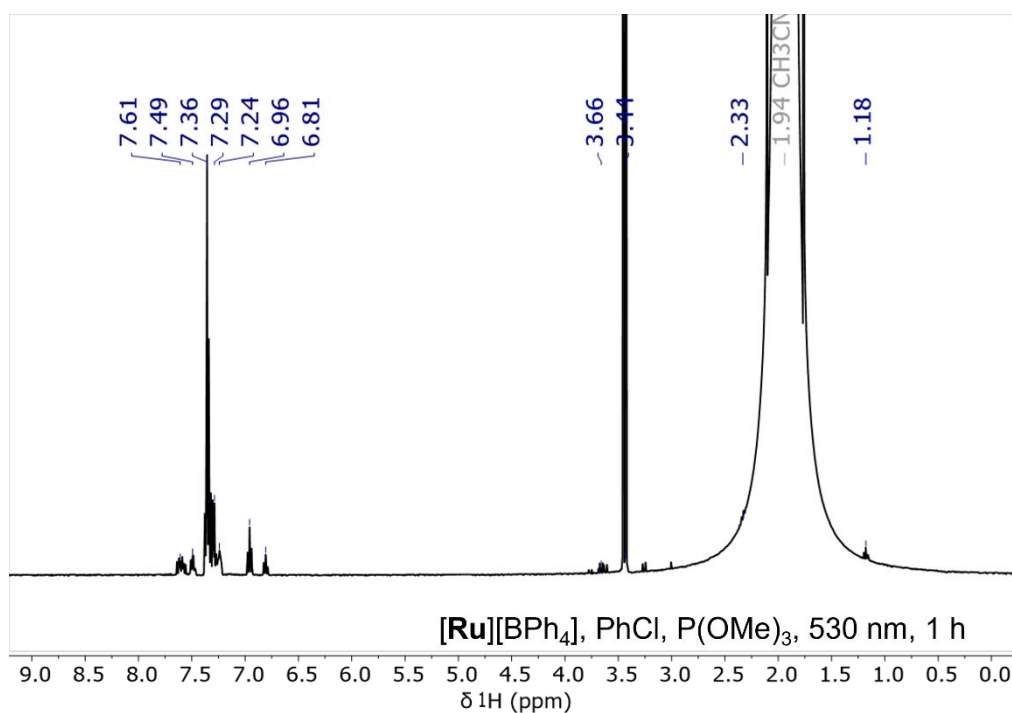

**Figure S29:**  $^1\text{H}$  NMR spectrum of the reaction between  $[\text{Ru}][\text{BPh}_4]$ , PhCl and  $\text{P}(\text{OMe})_3$  following irradiation at 530 nm for 1 h. Assignments:  $[\text{BPh}_4]^-$ ,  $\delta = 7.24, 6.96$  and  $6.81$  ppm; PhCl,  $\delta = 7.36-7.29$  ppm;  $\text{Ph}_3\text{PO}$ ,  $\delta = 7.61$  and  $7.49$  ppm;  $\text{P}(\text{OMe})_3$ ,  $\delta = 3.44$  ppm;  $\text{PhPO}(\text{OMe})_2$ ,  $\delta = 3.66$  ppm.  $\text{Ph}_3\text{PO}$  was added after the reaction was completed.

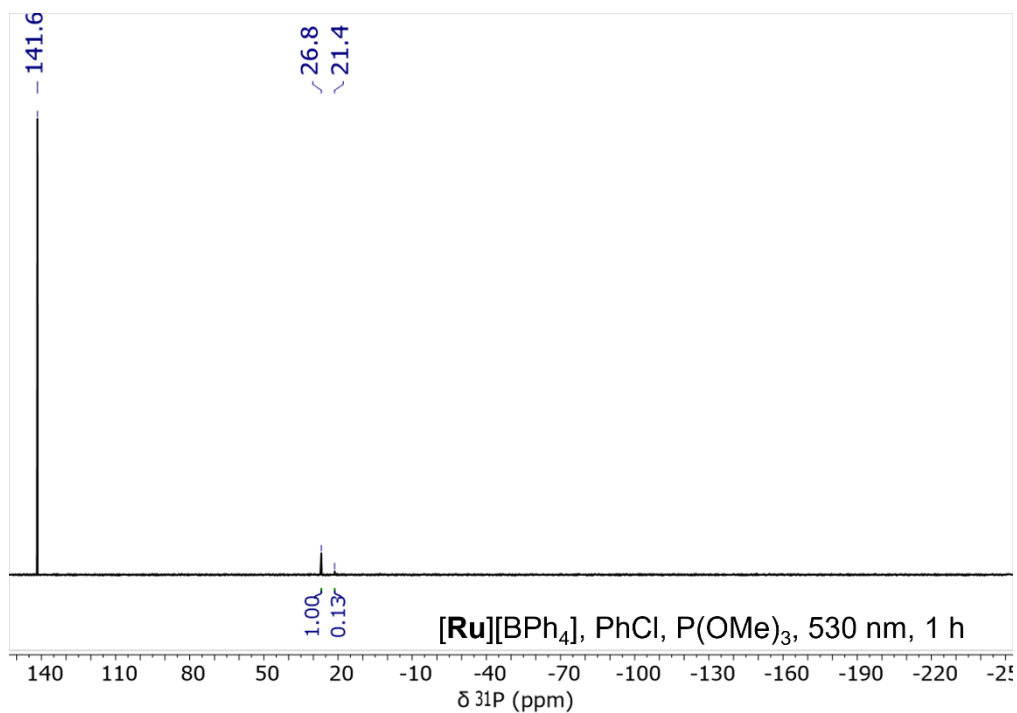

**Figure S30:**  $^{31}\text{P}\{^1\text{H}\}$  NMR spectrum of the reaction between  $[\text{Ru}][\text{BPh}_4]$ ,  $\text{PhCl}$  and  $\text{P}(\text{OMe})_3$  following irradiation at 530 nm for 1 h. Assignments:  $\text{P}(\text{OMe})_3$ ,  $\delta = 141.6$  ppm;  $\text{Ph}_3\text{PO}$ ,  $\delta = 26.8$  ppm;  $\text{PhPO}(\text{OMe})_2$ ,  $\delta = 21.4$  ppm.  $\text{Ph}_3\text{PO}$  was added after the reaction was completed. Yield of  $\text{PhPO}(\text{OMe})_3$ : 13%.

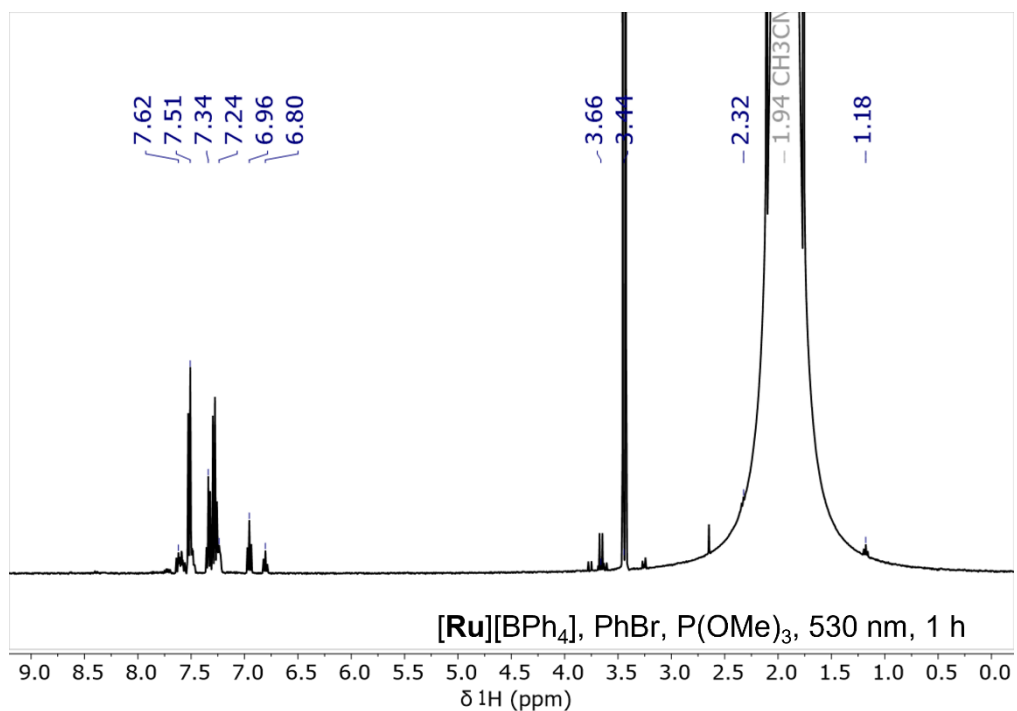

**Figure S31:**  $^1\text{H}$  NMR spectrum of the reaction between  $[\text{Ru}][\text{BPh}_4]$ ,  $\text{PhBr}$  and  $\text{P}(\text{OMe})_3$  following irradiation at 530 nm for 1 h. Assignments:  $[\text{BPh}_4]^-$ ,  $\delta = 7.24$ ,  $6.96$  and  $6.80$  ppm;  $\text{PhBr}$ ,  $\delta = 7.51$ ,  $7.34$ - $7.24$  ppm;  $\text{Ph}_3\text{PO}$ ,  $\delta = 7.62$  ppm;  $\text{P}(\text{OMe})_3$ ,  $\delta = 3.44$  ppm;  $\text{PhPO}(\text{OMe})_2$ ,  $\delta = 3.66$  ppm.  $\text{Ph}_3\text{PO}$  was added after the reaction was completed.

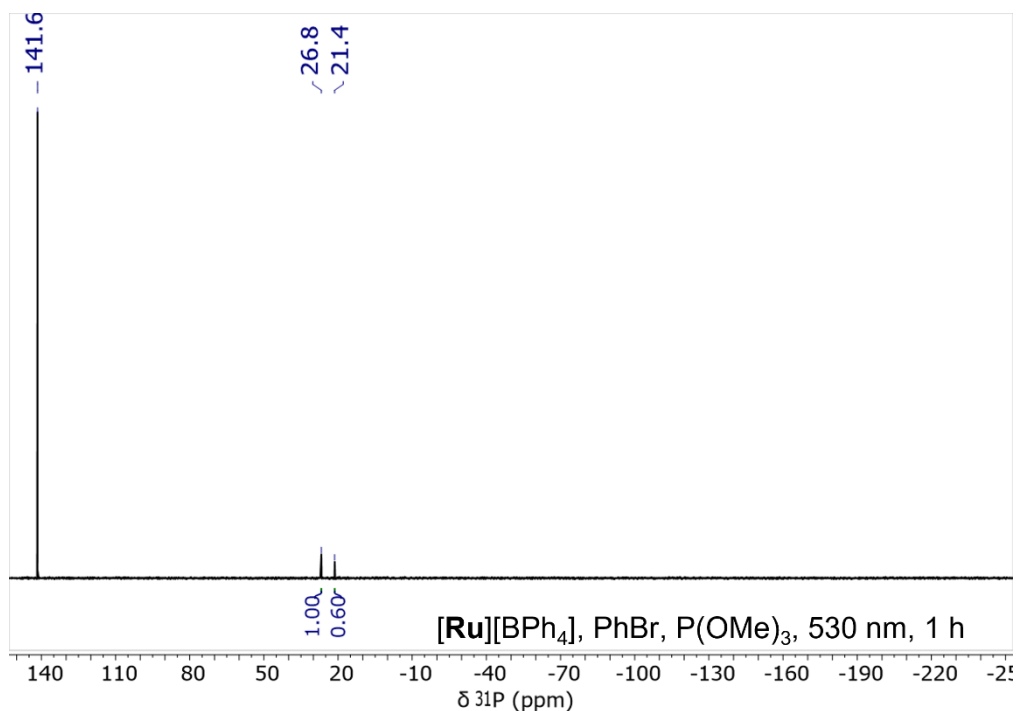

Figure S32:  $^{31}\text{P}\{^1\text{H}\}$  NMR spectrum of the reaction between  $[\text{Ru}][\text{BPh}_4]$ ,  $\text{PhBr}$  and  $\text{P}(\text{OMe})_3$  following irradiation at 530 nm for 1 h. Assignments:  $\text{P}(\text{OMe})_3$ ,  $\delta = 141.6$  ppm;  $\text{Ph}_3\text{PO}$ ,  $\delta = 26.8$  ppm;  $\text{PhPO}(\text{OMe})_2$ ,  $\delta = 21.4$  ppm.  $\text{Ph}_3\text{PO}$  was added after the reaction was completed. Yield of  $\text{PhPO}(\text{OMe})_2$ : 60%.

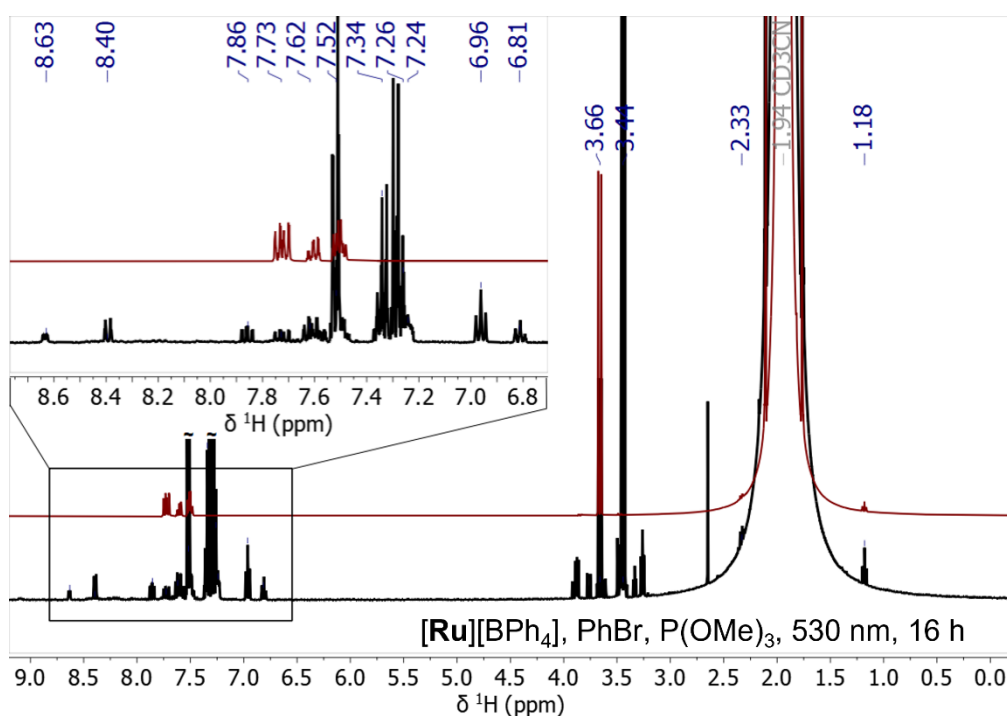

Figure S33:  $^1\text{H}$  NMR spectrum of the reaction between  $[\text{Ru}][\text{BPh}_4]$ ,  $\text{PhBr}$  and  $\text{P}(\text{OMe})_3$  following irradiation at 530 nm for 16 h. Assignments:  $[\text{BPh}_4]^-$ ,  $\delta = 7.24$ ,  $6.96$  and  $6.81$  ppm;  $[\text{Ru}(\text{bipy})_3]^{2+}$ ,  $8.63$ ,  $8.40$ ,  $7.86$  and  $7.62$  ppm;  $\text{PhBr}$ ,  $\delta = 7.52$ ,  $7.34$ - $7.26$  ppm;  $\text{Ph}_3\text{PO}$ ,  $\delta = 7.62$  ppm;  $\text{P}(\text{OMe})_3$ ,  $\delta = 3.44$  ppm;  $\text{PhPO}(\text{OMe})_2$ ,  $\delta = 7.73$  and  $3.66$  ppm. The expansion shows the aromatic region in more detail.  $\text{Ph}_3\text{PO}$  was added after the reaction was completed. Overlaid in maroon is the  $^1\text{H}$  NMR spectrum of commercially available  $\text{PhPO}(\text{OMe})_2$ .

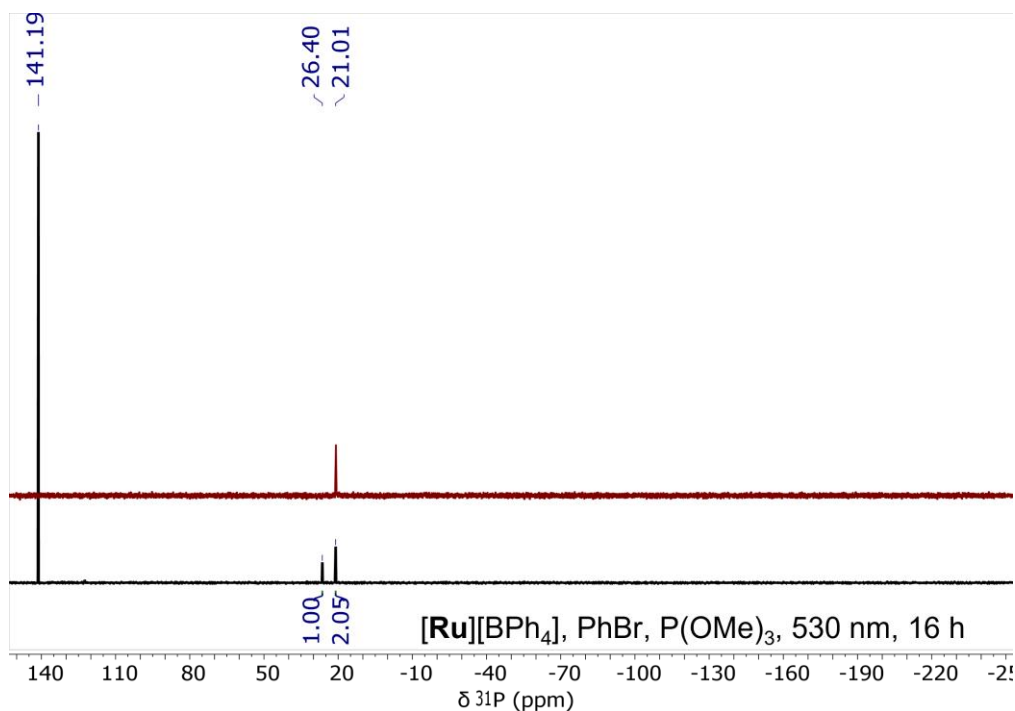

Figure S34:  $^{31}\text{P}\{^1\text{H}\}$  NMR spectrum of the reaction between  $[\text{Ru}][\text{BPh}_4]$ ,  $\text{PhBr}$  and  $\text{P}(\text{OMe})_3$  following irradiation at 530 nm for 16 h. Assignments:  $\text{P}(\text{OMe})_3$ ,  $\delta = 141.2$  ppm;  $\text{Ph}_3\text{PO}$ ,  $\delta = 26.4$  ppm;  $\text{PhPO}(\text{OMe})_2$ , 21.0 ppm.  $\text{Ph}_3\text{PO}$  was added after the reaction. Yield of  $\text{PhPO}(\text{OMe})_2 = 205\%$ . Overlaid in maroon is the  $^{31}\text{P}$  NMR spectrum of commercially available  $\text{PhPO}(\text{OMe})_2$ .

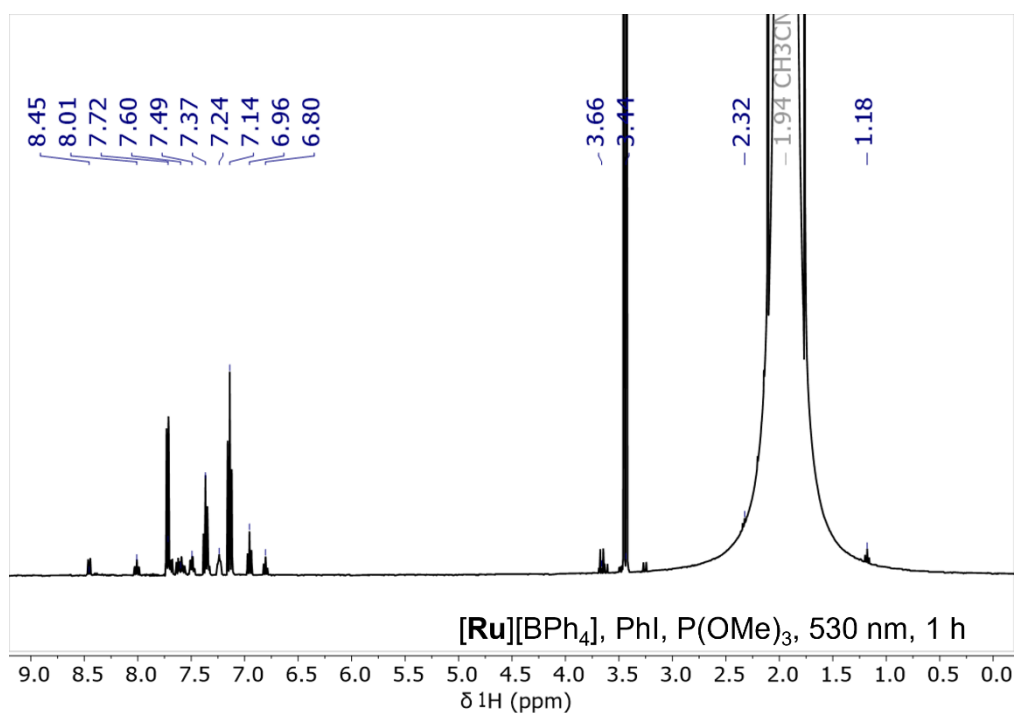

Figure S35:  $^1\text{H}$  NMR spectrum of the reaction between  $[\text{Ru}][\text{BPh}_4]$ ,  $\text{PhI}$  and  $\text{P}(\text{OMe})_3$  following irradiation at 530 nm for 1 h. Assignments:  $[\text{BPh}_4]^-$ ,  $\delta = 7.24$ , 6.96 and 6.80 ppm;  $\text{PhI}$ ,  $\delta = 7.72$ , 7.37 and 7.14 ppm;  $\text{Ph}_3\text{PO}$ ,  $\delta = 7.60$  and 7.49 ppm;  $\text{P}(\text{OMe})_3$ ,  $\delta = 3.44$  ppm;  $\text{PhPO}(\text{OMe})_2$ ,  $\delta = 3.66$  ppm;  $[\text{Ru}(\text{bipy})_3]^{2+}$ ,  $\delta = 8.45$  and 8.01 ppm.  $\text{Ph}_3\text{PO}$  was added after the reaction was completed.



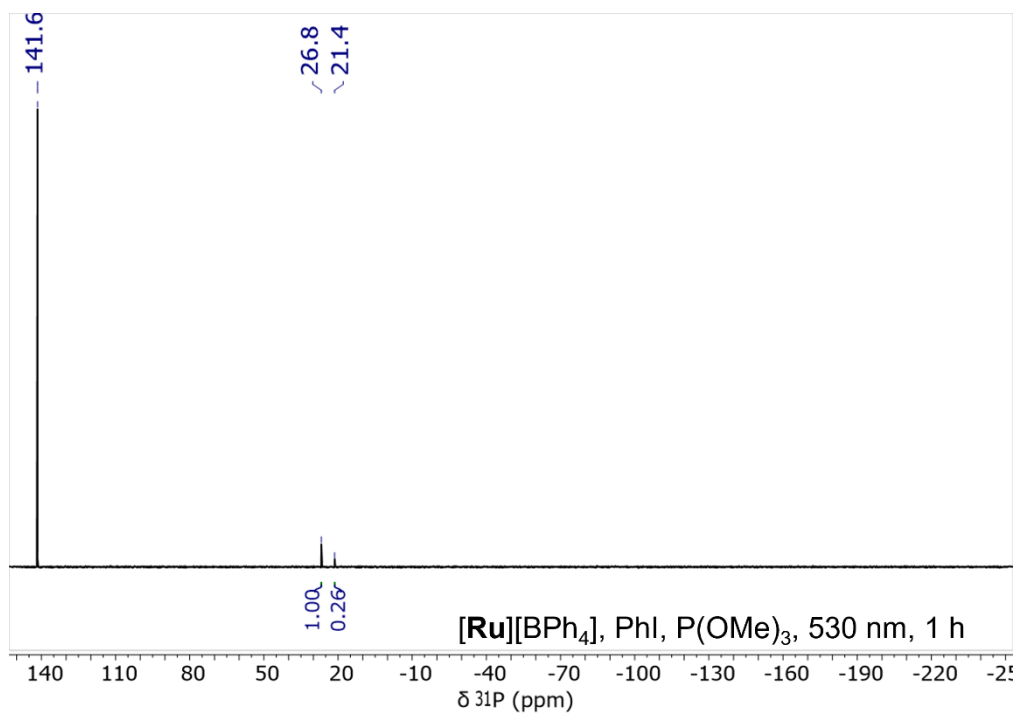

Figure S36:  $^{31}\text{P}\{^1\text{H}\}$  NMR spectrum of the reaction between  $[\text{Ru}][\text{BPh}_4]$ ,  $\text{PhI}$  and  $\text{P}(\text{OMe})_3$  following irradiation at 530 nm for 1 h. Assignments:  $\text{P}(\text{OMe})_3$ ,  $\delta = 141.6$  ppm;  $\text{Ph}_3\text{PO}$ ,  $\delta = 26.8$  ppm;  $\text{PhPO}(\text{OMe})_2$ ,  $\delta = 21.4$  ppm.  $\text{Ph}_3\text{PO}$  was added after the reaction was completed. Yield of  $\text{PhPO}(\text{OMe})_2$ : 26%.

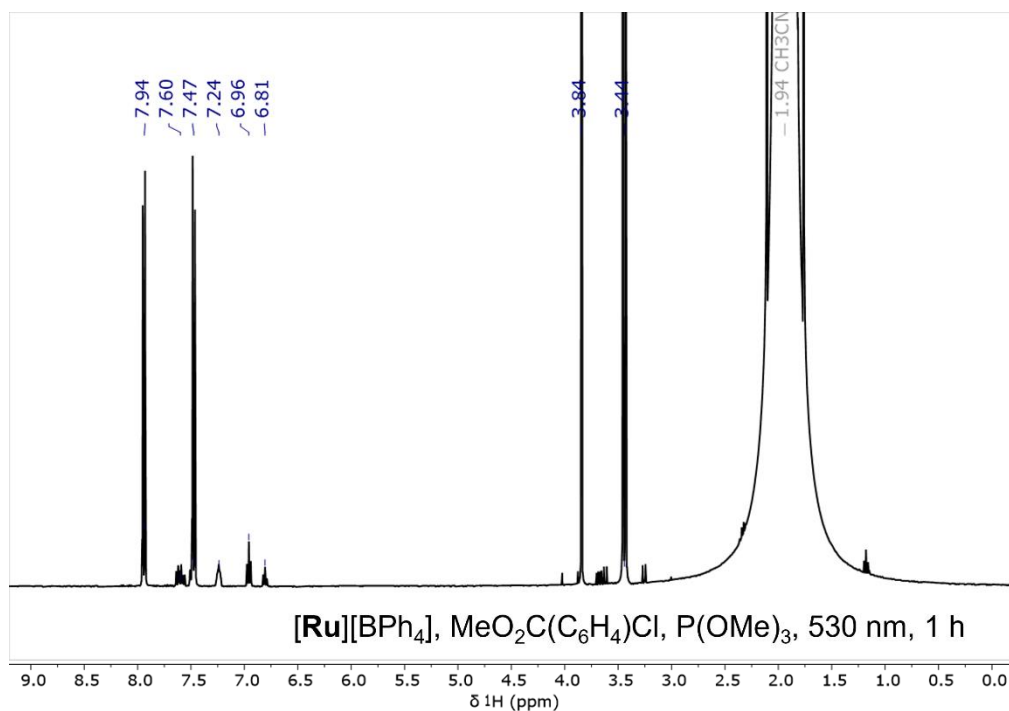

Figure S37:  $^1\text{H}$  NMR spectrum of the reaction between  $[\text{Ru}][\text{BPh}_4]$ ,  $\text{MeO}_2\text{C}(\text{C}_6\text{H}_4)\text{Cl}$  and  $\text{P}(\text{OMe})_3$  following irradiation at 530 nm for 1 h. Assignments:  $[\text{BPh}_4]^-$ ,  $\delta = 7.24$ ,  $6.96$  and  $6.81$  ppm;  $\text{MeO}_2\text{C}(\text{C}_6\text{H}_4)\text{Cl}$ ,  $\delta = 7.94$ ,  $7.47$  and  $3.84$  ppm;  $\text{Ph}_3\text{PO}$ ,  $\delta = 7.60$  ppm;  $\text{P}(\text{OMe})_3$ ,  $\delta = 3.44$  ppm.  $\text{Ph}_3\text{PO}$  was added after the reaction was completed.

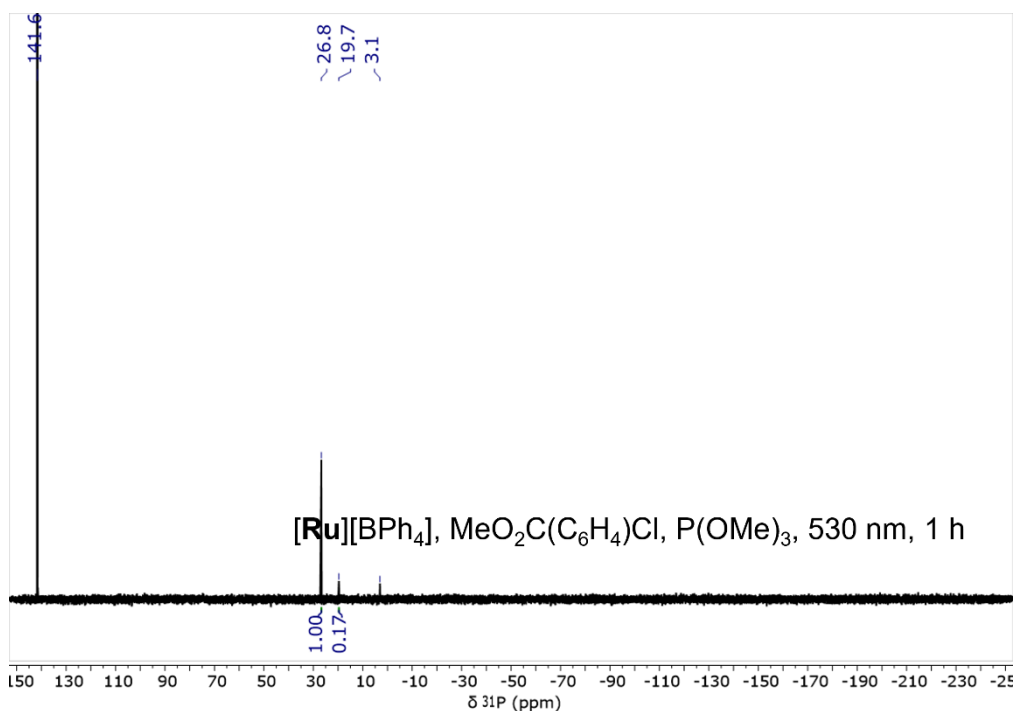

**Figure S38:**  $^{31}\text{P}\{^1\text{H}\}$  NMR spectrum of the reaction between  $[\text{Ru}][\text{BPh}_4]$ ,  $\text{MeO}_2\text{C}(\text{C}_6\text{H}_4)\text{Cl}$  and  $\text{P}(\text{OMe})_3$  following irradiation at 530 nm for 1 h. Assignments:  $\text{P}(\text{OMe})_3$ ,  $\delta = 141.6$  ppm;  $\text{Ph}_3\text{PO}$ ,  $\delta = 26.8$  ppm;  $\text{MeO}_2\text{C}(\text{C}_6\text{H}_4)\text{PO}(\text{OMe})_2$ ,  $\delta = 19.7$  ppm.  $\text{Ph}_3\text{PO}$  was added after the reaction was completed. Yield of  $\text{MeO}_2\text{C}(\text{C}_6\text{H}_4)\text{PO}(\text{OMe})_2 = 17\%$ .

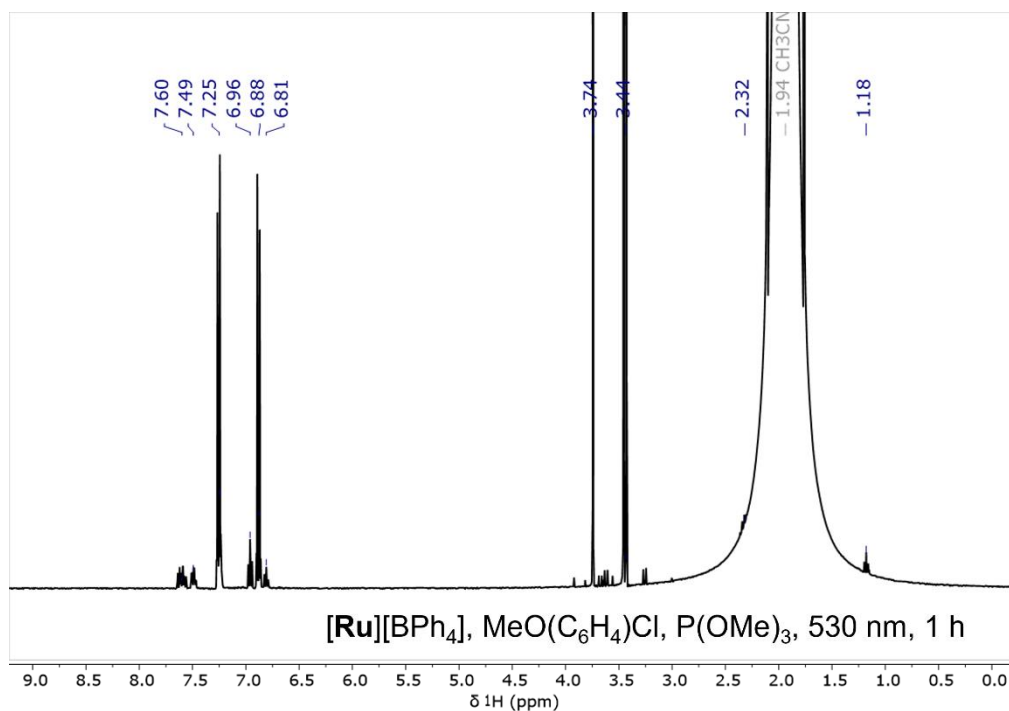

**Figure S39:**  $^1\text{H}$  NMR spectrum of the reaction between  $[\text{Ru}][\text{BPh}_4]$ ,  $\text{MeO}(\text{C}_6\text{H}_4)\text{Cl}$  and  $\text{P}(\text{OMe})_3$  following irradiation at 530 nm for 1 h. Assignments:  $[\text{BPh}_4]^-$ , 6.96 and 6.81 ppm;  $\text{MeO}(\text{C}_6\text{H}_4)\text{Cl}$ ,  $\delta = 7.25$ , 6.88 and 3.74 ppm;  $\text{Ph}_3\text{PO}$ ,  $\delta = 7.60$  and 7.49 ppm;  $\text{P}(\text{OMe})_3$ , 3.44 ppm.  $\text{Ph}_3\text{PO}$  was added after the reaction was completed.

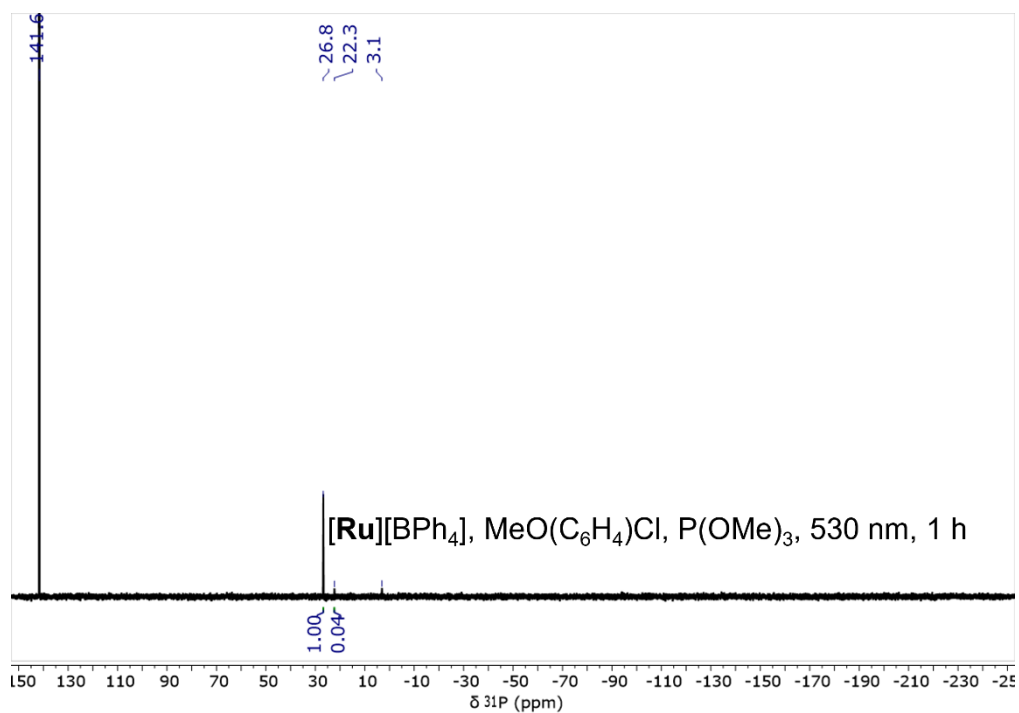

**Figure S40:**  $^{31}\text{P}\{^1\text{H}\}$  NMR spectrum of the reaction between  $[\text{Ru}][\text{BPh}_4]$ ,  $\text{MeO}(\text{C}_6\text{H}_4)$  and  $\text{P}(\text{OMe})_3$  following irradiation at 530 nm for 1 h. Assignments:  $\text{P}(\text{OMe})_3$ ,  $\delta = 141.6$  ppm;  $\text{Ph}_3\text{PO}$ ,  $\delta = 26.8$  ppm;  $\text{MeO}(\text{C}_6\text{H}_4)\text{PO}(\text{OMe})_2$ ,  $\delta = 22.3$  ppm.  $\text{Ph}_3\text{PO}$  was added after the reaction was completed. Yield of  $\text{MeO}(\text{C}_6\text{H}_4)\text{PO}(\text{OMe})_2 = 4\%$ .

### 3.3 Reduction chemistry of [Ru]Cl<sub>2</sub>

To determine whether [Ru]Cl<sub>2</sub> could perform similar aryl halide reduction chemistry, solutions containing [Ru]Cl<sub>2</sub>, PhCl, PhBr or PhI and B<sub>2</sub>pin<sub>2</sub> were irradiated with light of 530 or 455 nm for 1 h (see Figure S41 to Figure S49). We chose to use this radical trap as unlike P(OMe)<sub>3</sub> it did not appear to react with [Ru]Cl<sub>2</sub>. Similar products to those observed in the photostability study were detected (arising from the decomposition of [Ru]Cl<sub>2</sub> and from the reaction of [Ru]Cl<sub>2</sub> with B<sub>2</sub>pin<sub>2</sub>). However, only in the case of PhI were <sup>1</sup>H resonances consistent with PhBpin (the product of phenyl radical trapping by B<sub>2</sub>pin<sub>2</sub>) observed. In this case, the amount generated was too small to be observed by <sup>11</sup>B{<sup>1</sup>H} NMR, nor was it significant enough to be quantified by <sup>1</sup>H NMR. No significant difference was observed in reactivity at the two different wavelengths.

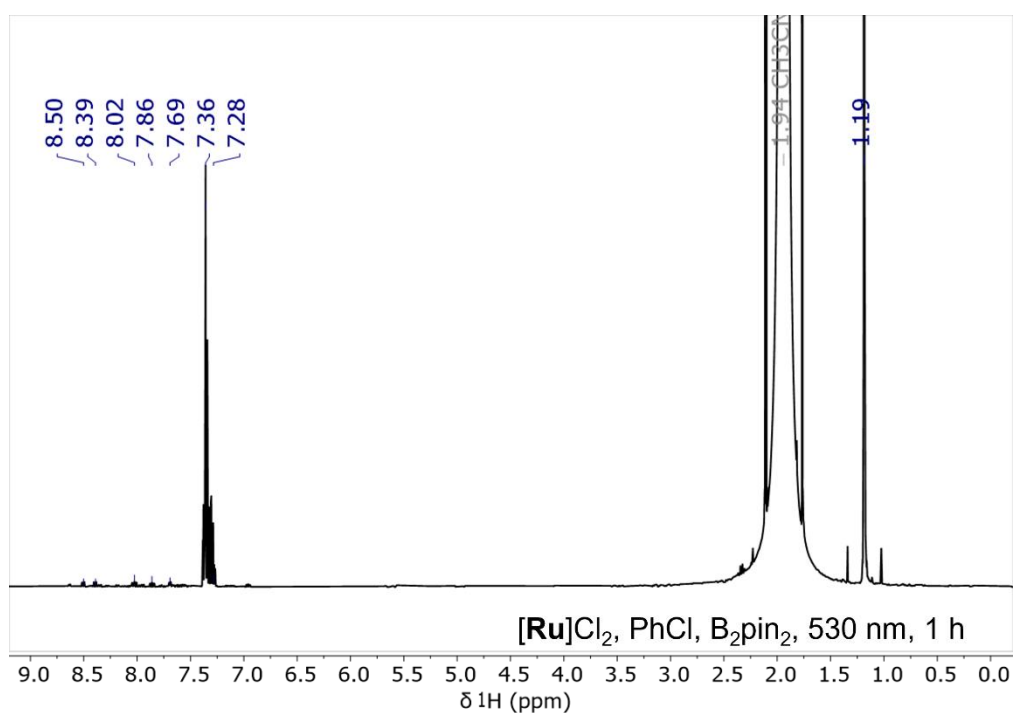

**Figure S41:** <sup>1</sup>H NMR spectrum of the reaction between [Ru]Cl<sub>2</sub>, PhCl and B<sub>2</sub>pin<sub>2</sub> following irradiation at 530 nm for 1 h. Assignments: PhCl, δ = 7.36-7.28 ppm; [Ru(bipy)<sub>3</sub>]<sup>2+</sup>, δ = 8.50, 8.02 and 7.69 ppm; B<sub>2</sub>pin<sub>2</sub>, δ = 1.19 ppm.

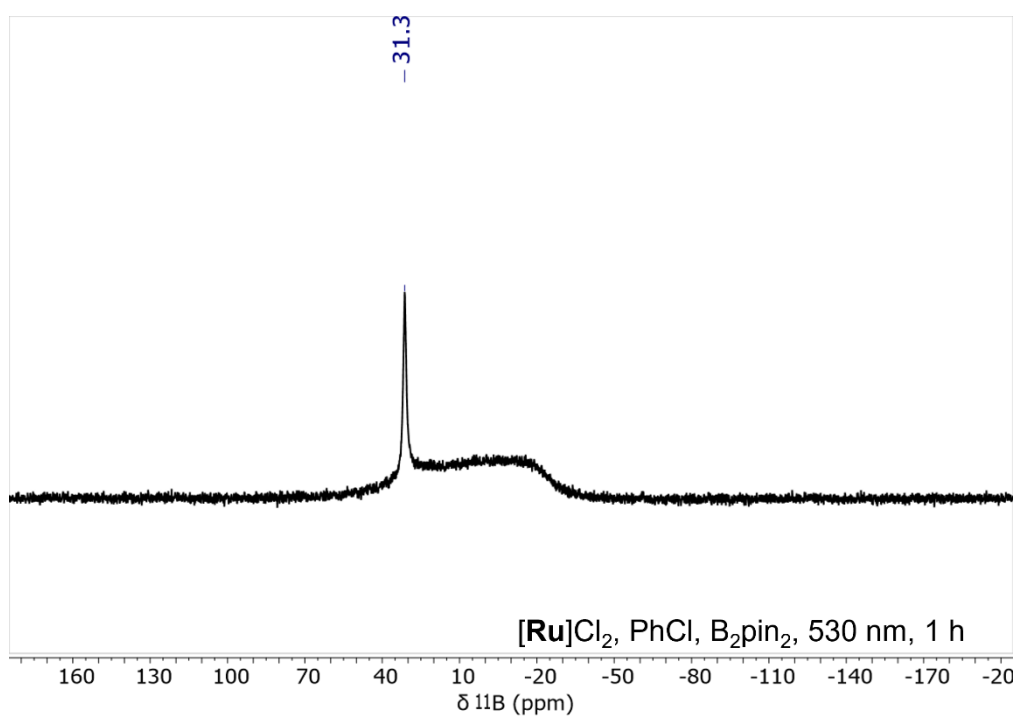

Figure S42:  $^{11}\text{B}\{^1\text{H}\}$  NMR spectrum of the reaction between  $[\text{Ru}]\text{Cl}_2$ ,  $\text{PhCl}$  and  $\text{B}_2\text{pin}_2$  following irradiation at 530 nm for 1 h. Assignment:  $\text{B}_2\text{pin}_2$ ,  $\delta = 31.3$  ppm.

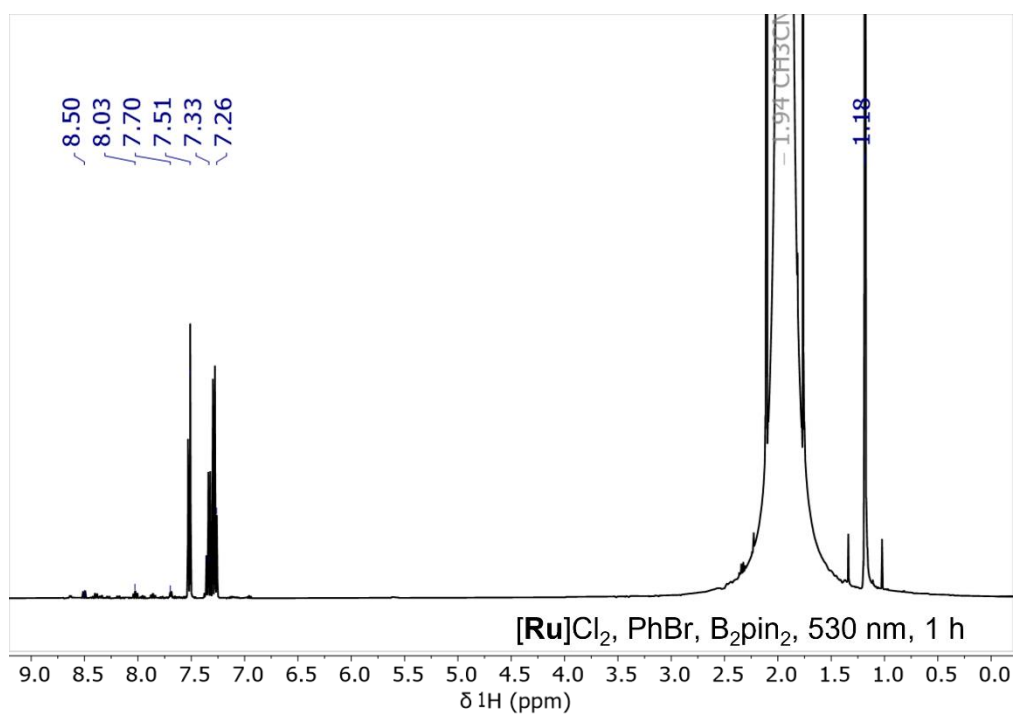

Figure S43:  $^1\text{H}$  NMR spectrum of the reaction between  $[\text{Ru}]\text{Cl}_2$ ,  $\text{PhBr}$  and  $\text{B}_2\text{pin}_2$  following irradiation at 530 nm for 1 h. Assignments:  $\text{PhBr}$ ,  $\delta = 7.51, 7.33\text{-}7.26$  ppm;  $[\text{Ru}(\text{bipy})_3]^{2+}$ ,  $\delta = 8.50, 8.03$  and  $7.70$  ppm;  $\text{B}_2\text{pin}_2$ ,  $\delta = 1.18$  ppm.

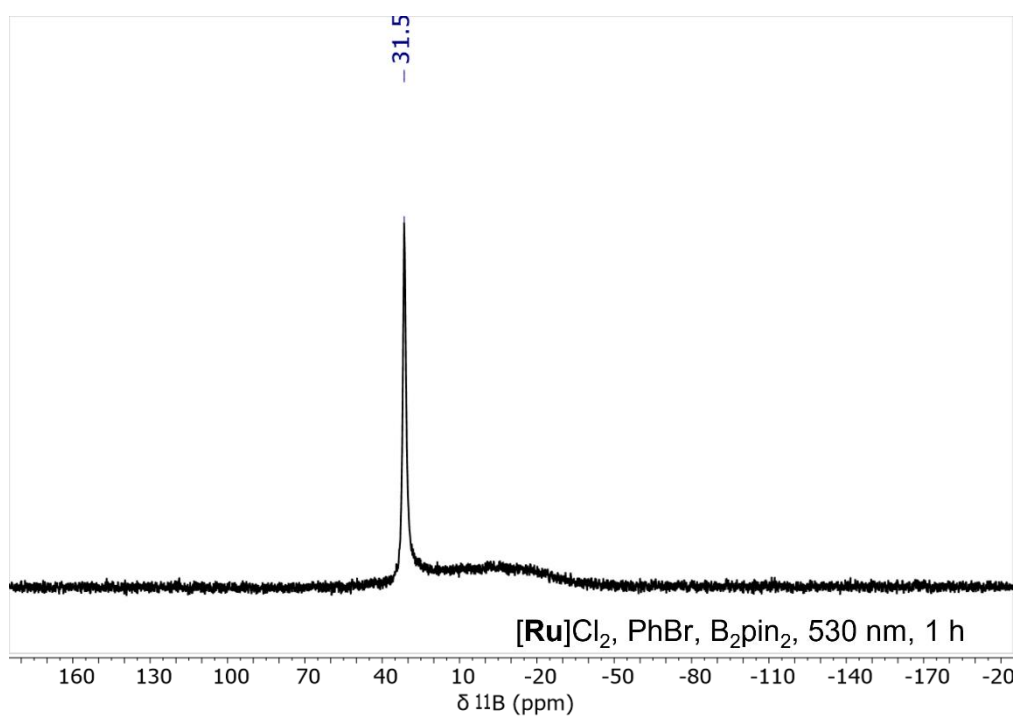

Figure S44:  $^{11}\text{B}\{^1\text{H}\}$  NMR spectrum of the reaction between  $[\text{Ru}]\text{Cl}_2$ ,  $\text{PhBr}$  and  $\text{B}_2\text{pin}_2$  following irradiation at 530 nm for 1 h. Assignment:  $\text{B}_2\text{pin}_2$ ,  $\delta = 31.5$  ppm.

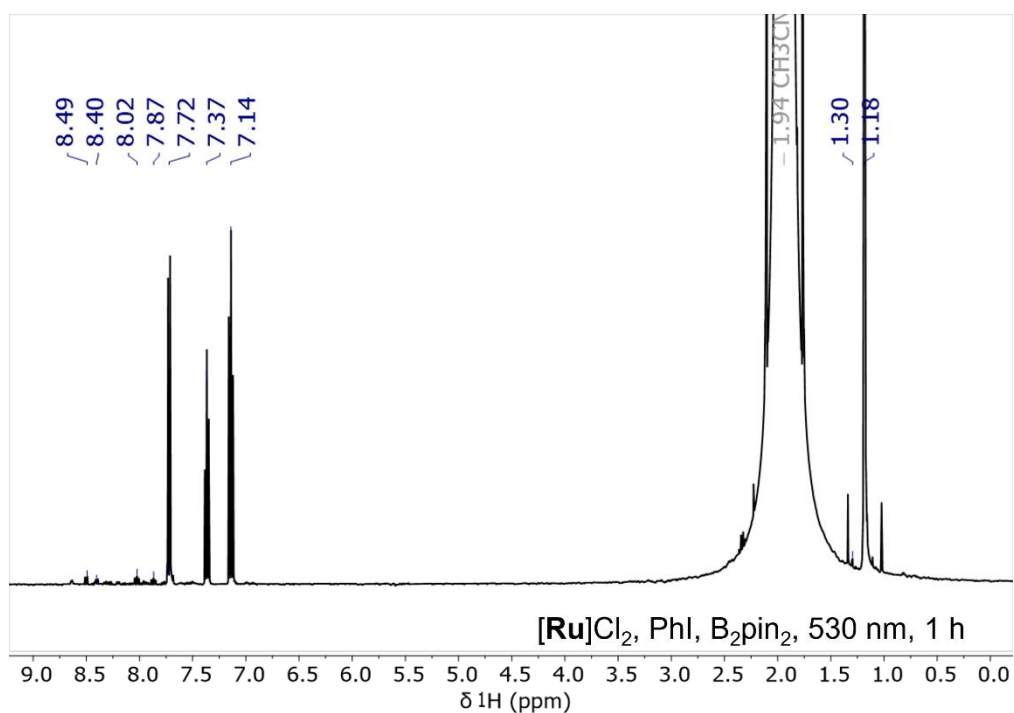

Figure S45:  $^1\text{H}$  NMR spectrum of the reaction between  $[\text{Ru}]\text{Cl}_2$ ,  $\text{PhI}$  and  $\text{B}_2\text{pin}_2$  following irradiation at 530 nm for 1 h. Assignments:  $\text{PhI}$ ,  $\delta = 7.72$ ,  $7.37$  and  $7.14$  ppm;  $[\text{Ru}(\text{bipy})_3]^{2+}$ ,  $\delta = 8.49$  and  $8.02$  ppm;  $\text{B}_2\text{pin}_2$ ,  $\delta = 1.18$  ppm;  $\text{PhBpin}$ ,  $\delta = 1.30$  ppm.  $\text{PhBpin}$  conversion was too low to measure reliably.

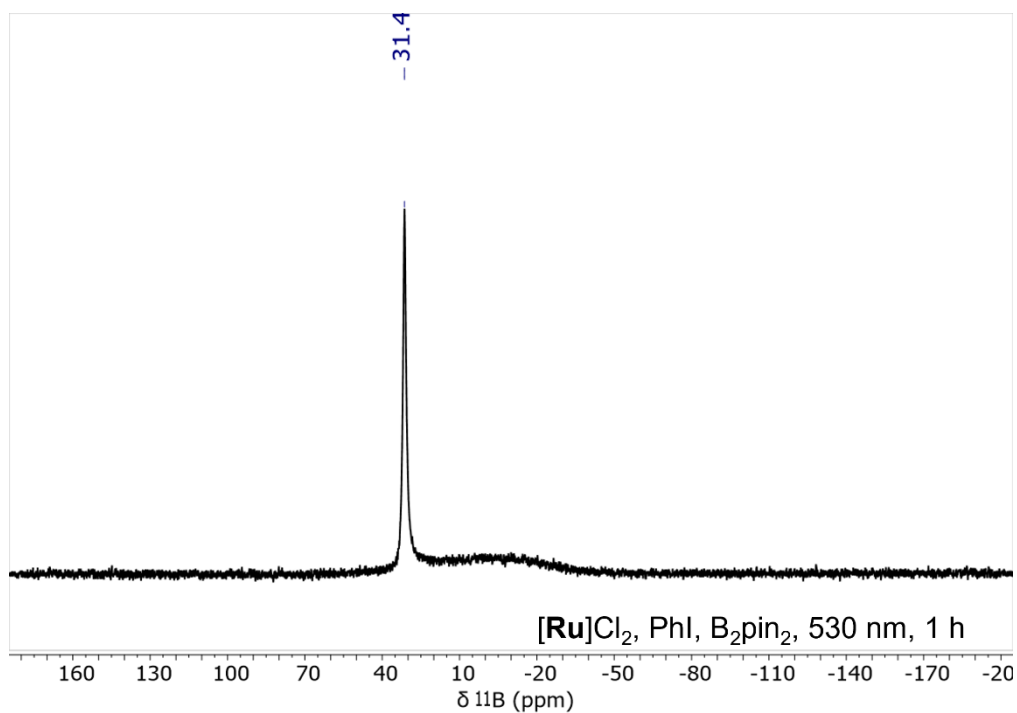

Figure S46:  $^{11}\text{B}\{^1\text{H}\}$  NMR spectrum of the reaction between  $[\text{Ru}]\text{Cl}_2$ , PhI and  $\text{B}_2\text{pin}_2$  following irradiation at 530 nm for 1 h. Assignment:  $\text{B}_2\text{pin}_2$ ,  $\delta = 31.4$  ppm.

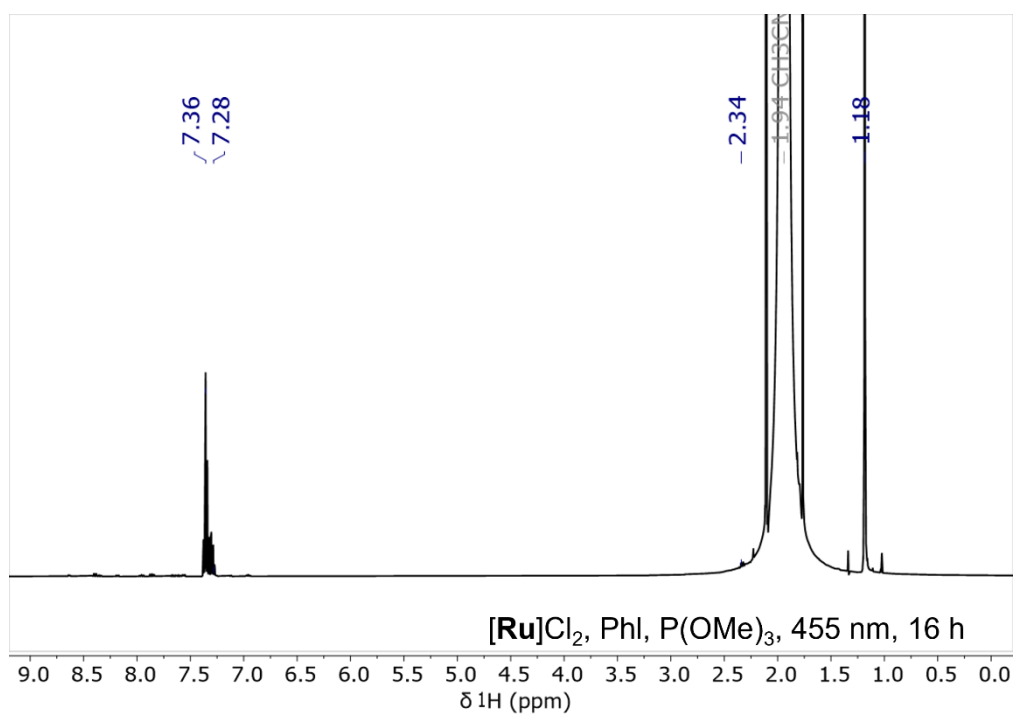

Figure S47:  $^1\text{H}$  NMR spectrum of the reaction between  $[\text{Ru}]\text{Cl}_2$ , PhCl and  $\text{B}_2\text{pin}_2$  following irradiation at 455 nm for 1 h. Assignments: PhCl,  $\delta = 7.36\text{-}7.28$  ppm;  $\text{B}_2\text{pin}_2$ , 1.18 ppm.

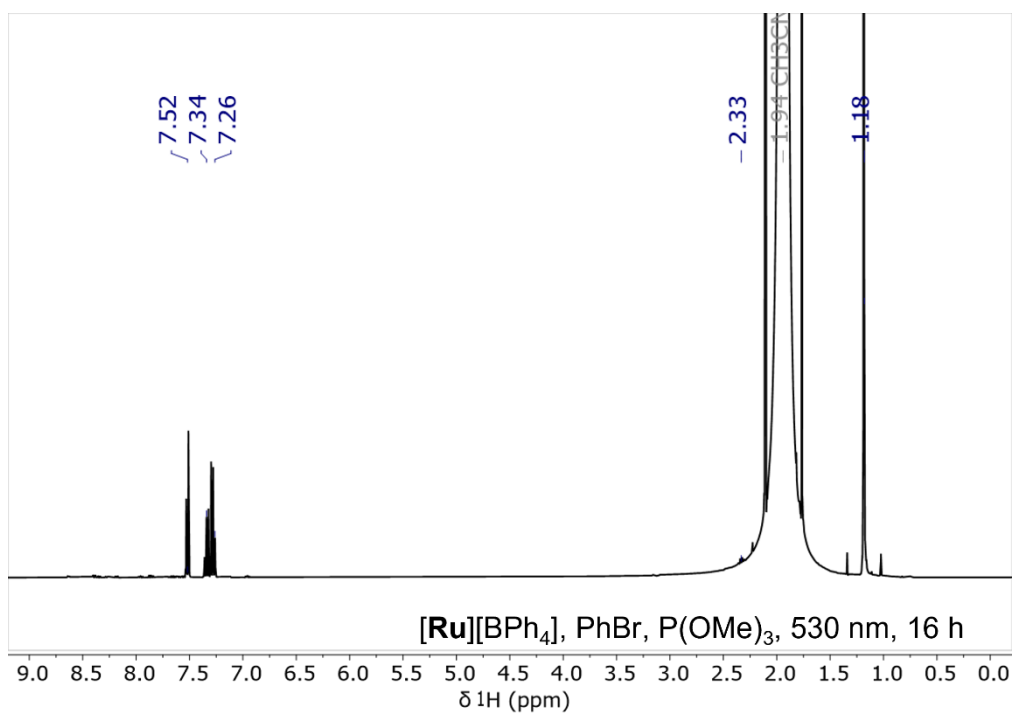

**Figure S48:** <sup>1</sup>H NMR spectrum of the reaction between [Ru]Cl<sub>2</sub>, PhBr and B<sub>2</sub>pin<sub>2</sub> following irradiation at 455 nm for 1 h. Assignments: PhBr,  $\delta$  = 7.52, 7.34-7.26 ppm; B<sub>2</sub>pin<sub>2</sub>, 1.18 ppm.

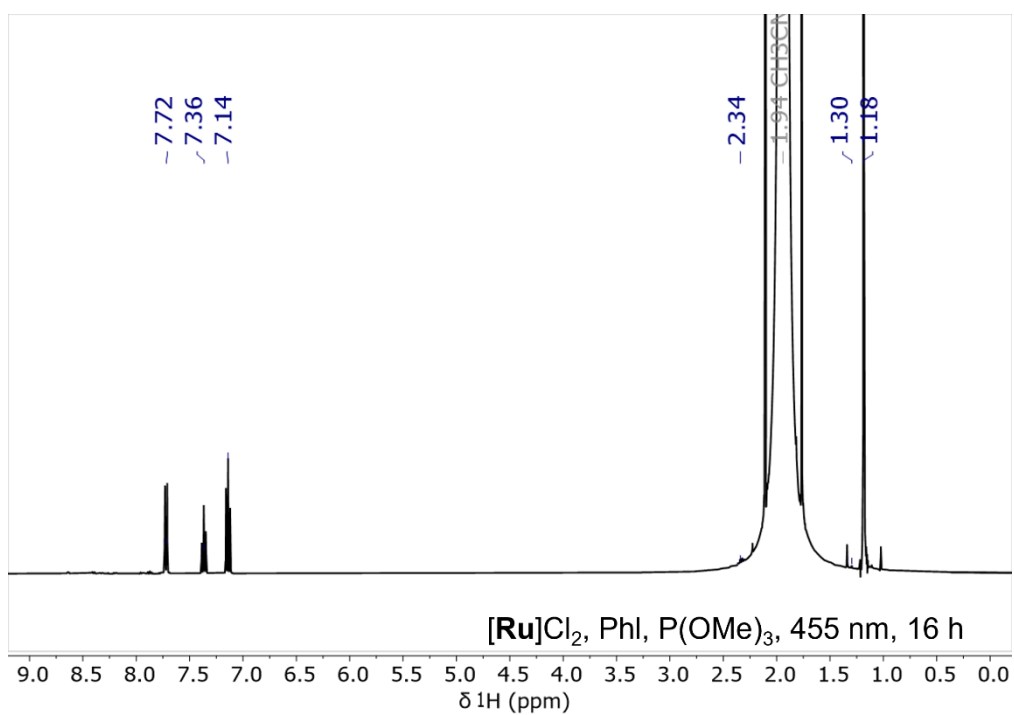

**Figure S49:** <sup>1</sup>H NMR spectrum of the reaction between [Ru]Cl<sub>2</sub>, PhI and B<sub>2</sub>pin<sub>2</sub> following irradiation at 455 nm for 1 h. Assignments: PhI,  $\delta$  = 7.72, 7.36 and 7.14 ppm; B<sub>2</sub>pin<sub>2</sub>,  $\delta$  = 1.18 ppm; PhBpin,  $\delta$  = 1.30 ppm. PhBpin conversion was too low to measure reliably.



## 4 Crystallographic information

Crystallographic data were collected at 150 K, on the SuperNova Dual diffractometer at the University of Oxford ( $[\text{Ru}][\text{BPh}_4]\cdot\text{THF}$ ) or the Xcalibur EosS2 diffractometer at the University of Bath ( $[\text{Ru}][\text{BPh}_4]\cdot\text{MeCN}$ ). Structures were solved and refined with Olex2 using the ShelXL plugin.<sup>4</sup> CCDC deposition numbers 2290574 ( $[\text{Ru}][\text{BPh}_4]\cdot\text{THF}$ ) and 2290732 ( $[\text{Ru}][\text{BPh}_4]\cdot\text{MeCN}$ ) contain the supplementary crystallographic information for this paper. These can be obtained free of charge from the Cambridge Crystallographic Data Centre.

### 4.1 XRD data for $[\text{Ru}][\text{BPh}_4]$

Tables S1 and S2 contain collected bond distance data as averages and ranges, respectively, for  $[\text{Ru}][\text{BPh}_4]\cdot\text{THF}$  and  $[\text{Ru}][\text{BPh}_4]\cdot\text{MeCN}$ , along with bond information for some other compounds containing the  $[\text{Ru}(\text{bipy})_3]^{n+}$  unit deposited in the CCDC. The numbering system used in the table is illustrated in Figure S50, and is different to the crystallographic atomic numbering. Note that no standard deviations could be calculated for the averaged bond distances due to the small sample sizes (max. 6). The literature compounds selected for comparison were limited to those with discrete, well-defined counter ions, to eliminate uncertainty in oxidation state assignment. See the MS and Figure S50 for discussion and a visual representation of the differences in bond distances between the bipy ligands, respectively. No significant differences were observed between the Ru-N(bipy) bond distances in  $[\text{Ru}][\text{BPh}_4]\cdot\text{THF}$  and the other complexes considered, despite the oxidation to  $\text{Ru}^{3+}$  in  $[\text{Ru}]^{3+}$ ,<sup>5</sup> and reduction of the bipy ligands in  $[\text{Ru}]^+$  and  $[\text{Ru}]^0$ .<sup>6</sup> It has previously been suggested that this stems from the  $\pi$ -backbonding reducing in strength upon oxidation of  $\text{Ru}^{2+}$  to  $\text{Ru}^{3+}$ , thus counteracting the increase in electrostatic interactions. Similarly, addition of an electron to a bipy ligand reduces backbonding from Ru.

**Table S1: Compiled average bond distance values from a series of different solid-state molecular structures containing  $[\text{Ru}(\text{bipy})_3]^{n+}$  ( $n = 3, 2, 1, 0$ ). The numbering scheme for the bipy ligands is shown in Figure S50.**

| Complex                                                            | Selected bond distances ( $\text{\AA}$ ): |       |              |              |       |              |              |        |
|--------------------------------------------------------------------|-------------------------------------------|-------|--------------|--------------|-------|--------------|--------------|--------|
|                                                                    | N1-C6                                     | C6-C5 | C5-C4        | C4-C3        | C3-C2 | N1-C2        | C2-C2'       | Ru-N1  |
| <sup>a</sup> $[\text{Ru}(\text{bipy})_3][\text{PF}_6]_3$           | 1.353                                     | 1.379 | 1.389        | 1.381        | 1.389 | 1.360        | 1.450        | 2.057  |
| <sup>b</sup> $[\text{Ru}(\text{bipy})_3][\text{PF}_6]_2$           | 1.348                                     | 1.372 | 1.370        | 1.385        | 1.376 | 1.353        | 1.475        | 2.056  |
| $[\text{Ru}][\text{BPh}_4]\cdot\text{THF}$ :<br>bipy <sup>0</sup>  | 1.347                                     | 1.383 | 1.380        | 1.381        | 1.391 | 1.362        | 1.469        | 2.0540 |
| $[\text{Ru}][\text{BPh}_4]\cdot\text{THF}$ :<br>bipy <sup>1-</sup> | 1.347                                     | 1.379 | <b>1.404</b> | <b>1.364</b> | 1.421 | <b>1.394</b> | <b>1.419</b> | 2.0545 |
| $[\text{Ru}][\text{BPh}_4]\cdot\text{MeCN}$ :                      | 1.345                                     | 1.373 | 1.382        | 1.373        | 1.398 | 1.371        | 1.446        | 2.052  |
| <sup>c</sup> $[\text{Ru}(\text{bipy})_3]^0$                        | 1.359                                     | 1.368 | 1.402        | 1.372        | 1.412 | 1.383        | 1.440        | 2.046  |

<sup>a</sup>Data from reference 5. <sup>b</sup>Data from reference 7. <sup>c</sup>Data from reference 6. To compile this table, the bond distances of each bipy ligand were given as a range. The only structure that exhibited consistently statistically different bond distances between its bipy ligands was  $[\text{Ru}][\text{BPh}_4]\cdot\text{THF}$ . Bond distances highlighted in **red** are statistically longer, while those highlighted in **blue** are statistically shorter than equivalent others in the same complex. For an indication of the standard deviations used to calculate the statistical differences, see Table S2.

**Table S2: Compiled bond distance ranges from a series of different solid-state molecular structures containing [Ru(bipy)3]n+ (n = 3, 2, 1, 0). The numbering scheme for the bipy ligands is shown in Figure S50.**

| Complex                                                              | Selected bond distances (Å): |                       |                                     |                                     |                       |                                     |                       |                           |
|----------------------------------------------------------------------|------------------------------|-----------------------|-------------------------------------|-------------------------------------|-----------------------|-------------------------------------|-----------------------|---------------------------|
|                                                                      | N1-C6                        | C6-C5                 | C5-C4                               | C4-C3                               | C3-C2                 | N1-C2                               | C2-C2'                | Ru-N1                     |
| <sup>a</sup> [Ru(bipy) <sub>3</sub> ][PF <sub>6</sub> ] <sub>3</sub> | 1.353(5)                     | 1.379(6)              | 1.389(6)                            | 1.381(6)                            | 1.389(5)              | 1.360(5)                            | 1.450(7)              | 2.057(3)                  |
| <sup>b</sup> [Ru(bipy) <sub>3</sub> ][PF <sub>6</sub> ] <sub>2</sub> | 1.338(6)-<br>1.361(5)        | 1.365(6)-<br>1.376(7) | 1.356(7)-<br>1.389(7)               | 1.376(8)-<br>1.403(7)               | 1.367(7)-<br>1.399(6) | 1.336(5)-<br>1.365(5)               | 1.470(6)-<br>1.478(5) | 2.058(4)-<br>2.067(4)     |
| [Ru][BPh <sub>4</sub> ].THF:<br>bipy <sup>0</sup>                    | 1.346(2)-<br>1.349(2)        | 1.381(3)-<br>1.399(3) | 1.378(3)-<br>1.383(3)               | 1.377(3)-<br>1.384(3)               | 1.389(2)-<br>1.394(3) | 1.358(2)-<br>1.364(2)               | 1.467(3)-<br>1.471(2) | 2.0497(13)-<br>2.0568(14) |
| [Ru][BPh <sub>4</sub> ].THF:<br>bipy <sup>1-</sup>                   | 1.346(2)-<br>1.347(2)        | 1.378(3)-<br>1.379(3) | <b>1.402(3)-</b><br><b>1.405(3)</b> | <b>1.363(3)-</b><br><b>1.364(3)</b> | 1.419(3)-<br>1.423(3) | <b>1.392(2)-</b><br><b>1.395(2)</b> | <b>1.419(3)</b>       | 2.0489(14)-<br>2.0600(14) |
| [Ru][BPh <sub>4</sub> ].MeCN:                                        | 1.338(3)-<br>1.353(3)        | 1.371(4)-<br>1.379(4) | 1.375(4)-<br>1.392(4)               | 1.368(4)-<br>1.381(4)               | 1.384(4)-<br>1.408(4) | 1.362(3)-<br>1.382(3)               | 1.434(4)-<br>1.465(3) | 2.045(2)-<br>2.060(2)     |
| <sup>c</sup> [Ru(bipy) <sub>3</sub> ] <sup>0</sup>                   | 1.355(4)-<br>1.362(4)        | 1.360(4)-<br>1.375(4) | 1.394(5)-<br>1.415(5)               | 1.367(4)-<br>1.378(4)               | 1.405(4)-<br>1.417(4) | 1.380(3)-<br>1.385(4)               | 1.431(5)-<br>1.448(4) | 2.041(2)-<br>2.059(2)     |

<sup>a</sup>Data from reference 5. <sup>b</sup>Data from reference 7. <sup>c</sup>Data from reference 6. To compile this table, the bond distances of each bipy ligand were given as a range. The only structure that exhibited consistently statistically different bond distances between its bipy ligands was [Ru][BPh<sub>4</sub>].THF. Bond distances highlighted in **red** are statistically longer, while those highlighted in **blue** are statistically shorter than equivalent others in the same complex.

**[Ru][BPh<sub>4</sub>].THF:**

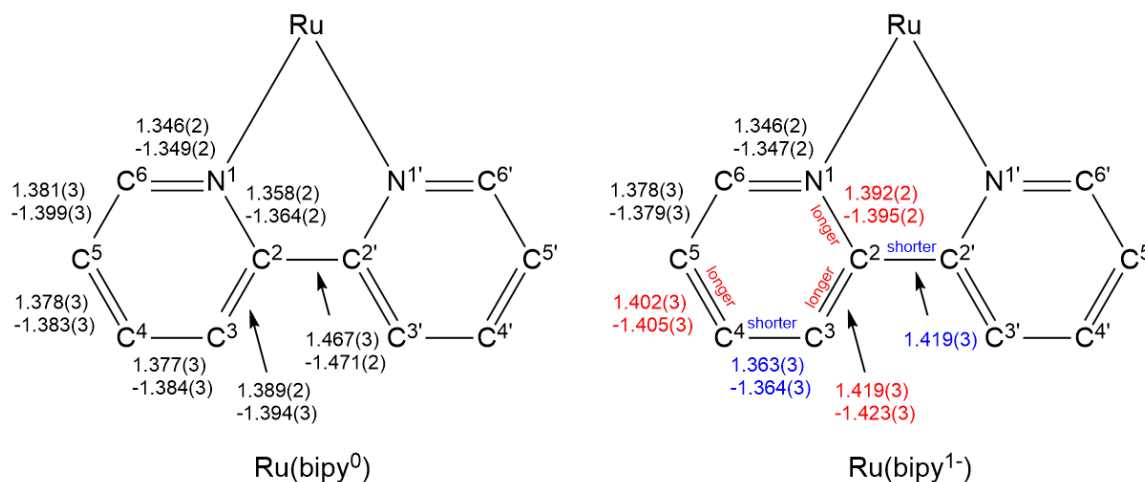

**Figure S50: Atomic numbering of the bipy ligands used to complete Table S1: Compiled average bond distance values from a series of different solid-state molecular structures containing [Ru(bipy)3]n+ (n = 3, 2, 1, 0). The numbering scheme for the bipy ligands is shown in Figure S50.**

| Complex                                                              | Selected bond distances (Å): |       |              |              |       |              |              |        |
|----------------------------------------------------------------------|------------------------------|-------|--------------|--------------|-------|--------------|--------------|--------|
|                                                                      | N1-C6                        | C6-C5 | C5-C4        | C4-C3        | C3-C2 | N1-C2        | C2-C2'       | Ru-N1  |
| <sup>a</sup> [Ru(bipy) <sub>3</sub> ][PF <sub>6</sub> ] <sub>3</sub> | 1.353                        | 1.379 | 1.389        | 1.381        | 1.389 | 1.360        | 1.450        | 2.057  |
| <sup>b</sup> [Ru(bipy) <sub>3</sub> ][PF <sub>6</sub> ] <sub>2</sub> | 1.348                        | 1.372 | 1.370        | 1.385        | 1.376 | 1.353        | 1.475        | 2.056  |
| [Ru][BPh <sub>4</sub> ].THF:<br>bipy <sup>0</sup>                    | 1.347                        | 1.383 | 1.380        | 1.381        | 1.391 | 1.362        | 1.469        | 2.0540 |
| [Ru][BPh <sub>4</sub> ].THF:<br>bipy <sup>1-</sup>                   | 1.347                        | 1.379 | <b>1.404</b> | <b>1.364</b> | 1.421 | <b>1.394</b> | <b>1.419</b> | 2.0545 |
| [Ru][BPh <sub>4</sub> ].MeCN<br>:                                    | 1.345                        | 1.373 | 1.382        | 1.373        | 1.398 | 1.371        | 1.446        | 2.052  |
| <sup>c</sup> [Ru(bipy) <sub>3</sub> ] <sup>0</sup>                   | 1.359                        | 1.368 | 1.402        | 1.372        | 1.412 | 1.383        | 1.440        | 2.046  |

<sup>a</sup>Data from reference 5. <sup>b</sup>Data from reference 7. <sup>c</sup>Data from reference 6. To compile this table, the bond distances of each bipy ligand were given as a range. The only structure that exhibited consistently statistically different bond distances between its bipy ligands was [Ru][BPh<sub>4</sub>].THF. Bond distances highlighted in **red** are statistically longer, while those highlighted in **blue** are statistically shorter than equivalent others in the same complex. For an indication of the standard deviations used to calculate the statistical differences, see Table S2.



## 4.2 Crystallographic collection data and full bond information for [Ru][BPh<sub>4</sub>]-THF

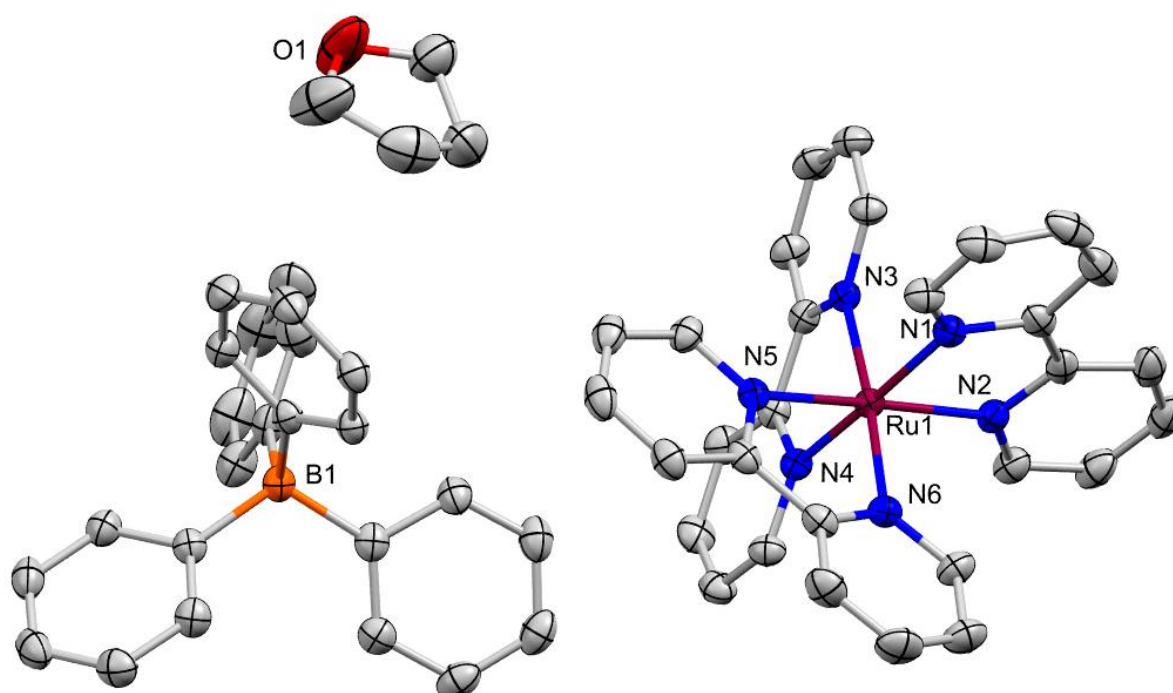

Figure S51: Solid-state molecular structure of [Ru][BPh<sub>4</sub>]-THF. Ellipsoids drawn at 50% probability. H atoms omitted for clarity. Atom colours: Ru, burgundy; N, blue; B, orange; O, red; C, grey.

Table S3: Crystallographic data and structure refinement details for [Ru][BPh<sub>4</sub>]-THF

| Empirical formula                           | C <sub>58</sub> H <sub>48</sub> BN <sub>6</sub> ORu           |
|---------------------------------------------|---------------------------------------------------------------|
| Formula weight                              | 960.93                                                        |
| Temperature/K                               | 150.15                                                        |
| Crystal system                              | monoclinic                                                    |
| Space group                                 | P2 <sub>1</sub> /c                                            |
| a/Å                                         | 12.20192(15)                                                  |
| b/Å                                         | 28.9704(4)                                                    |
| c/Å                                         | 13.67518(16)                                                  |
| α/°                                         | 90                                                            |
| β/°                                         | 99.9543(12)                                                   |
| γ/°                                         | 90                                                            |
| Volume/Å <sup>3</sup>                       | 4761.33(11)                                                   |
| Z                                           | 4                                                             |
| ρ <sub>calc</sub> /cm <sup>3</sup>          | 1.341                                                         |
| μ/mm <sup>-1</sup>                          | 3.035                                                         |
| F(000)                                      | 1996.0                                                        |
| Crystal size/mm <sup>3</sup>                | 0.2 × 0.2 × 0.1                                               |
| Radiation                                   | Cu Kα (λ = 1.54184)                                           |
| 2θ range for data collection/°              | 7.238 to 152.742                                              |
| Index ranges                                | -15 ≤ h ≤ 15, -36 ≤ k ≤ 35, -15 ≤ l ≤ 17                      |
| Reflections collected                       | 38786                                                         |
| Independent reflections                     | 9872 [R <sub>int</sub> = 0.0358, R <sub>sigma</sub> = 0.0289] |
| Data/restraints/parameters                  | 9872/0/604                                                    |
| Goodness-of-fit on F <sup>2</sup>           | 1.034                                                         |
| Final R indexes [I ≥ 2σ (I)]                | R <sub>1</sub> = 0.0270, wR <sub>2</sub> = 0.0659             |
| Final R indexes [all data]                  | R <sub>1</sub> = 0.0326, wR <sub>2</sub> = 0.0693             |
| Largest diff. peak/hole / e Å <sup>-3</sup> | 0.59/-0.49                                                    |

**Table S4: Tabulated bond distances in [Ru][BPh<sub>4</sub>]-THF**

| Atom 1 | Atom 2 | Bond Distance (Å) | Atom 1 | Atom 2 | Bond Distance (Å) |
|--------|--------|-------------------|--------|--------|-------------------|
| Ru1    | N1     | 2.0489(14)        | C17    | C18    | 1.384(3)          |
| Ru1    | N2     | 2.0600(14)        | C18    | C19    | 1.379(3)          |
| Ru1    | N3     | 2.0568(14)        | C19    | C20    | 1.381(2)          |
| Ru1    | N4     | 2.0552(14)        | C21    | C22    | 1.385(3)          |
| Ru1    | N5     | 2.0497(13)        | C22    | C23    | 1.379(3)          |
| Ru1    | N6     | 2.0542(14)        | C23    | C24    | 1.377(3)          |
| O1     | C55    | 1.405(4)          | C24    | C25    | 1.389(2)          |
| O1     | C58    | 1.398(3)          | C25    | C26    | 1.467(3)          |
| N1     | C1     | 1.347(2)          | C26    | C27    | 1.394(3)          |
| N1     | C5     | 1.395(2)          | C27    | C28    | 1.381(3)          |
| N2     | C6     | 1.392(2)          | C28    | C29    | 1.378(3)          |
| N2     | C10    | 1.346(2)          | C29    | C30    | 1.382(3)          |
| N3     | C11    | 1.345(2)          | C31    | C32    | 1.399(3)          |
| N3     | C15    | 1.361(2)          | C31    | C36    | 1.400(3)          |
| N4     | C16    | 1.363(2)          | C32    | C33    | 1.393(3)          |
| N4     | C20    | 1.346(2)          | C33    | C34    | 1.379(4)          |
| N5     | C21    | 1.346(2)          | C34    | C35    | 1.377(4)          |
| N5     | C25    | 1.364(2)          | C35    | C36    | 1.390(3)          |
| N6     | C26    | 1.358(2)          | C37    | C38    | 1.406(3)          |
| N6     | C30    | 1.349(2)          | C37    | C42    | 1.403(3)          |
| B1     | C31    | 1.643(3)          | C38    | C39    | 1.396(3)          |
| B1     | C37    | 1.645(2)          | C39    | C40    | 1.381(3)          |
| B1     | C43    | 1.645(3)          | C40    | C41    | 1.383(3)          |
| B1     | C49    | 1.648(3)          | C41    | C42    | 1.391(3)          |
| C1     | C2     | 1.378(3)          | C43    | C44    | 1.398(3)          |
| C2     | C3     | 1.405(3)          | C43    | C48    | 1.410(2)          |
| C3     | C4     | 1.363(3)          | C44    | C45    | 1.402(3)          |
| C4     | C5     | 1.419(3)          | C45    | C46    | 1.377(3)          |
| C5     | C6     | 1.419(3)          | C46    | C47    | 1.389(3)          |
| C6     | C7     | 1.423(3)          | C47    | C48    | 1.392(3)          |
| C7     | C8     | 1.364(3)          | C49    | C50    | 1.402(2)          |
| C8     | C9     | 1.402(3)          | C49    | C54    | 1.410(2)          |
| C9     | C10    | 1.379(3)          | C50    | C51    | 1.398(3)          |
| C11    | C12    | 1.384(3)          | C51    | C52    | 1.386(3)          |
| C12    | C13    | 1.383(3)          | C52    | C53    | 1.388(3)          |
| C13    | C14    | 1.381(3)          | C53    | C54    | 1.391(3)          |
| C14    | C15    | 1.391(2)          | C55    | C56    | 1.519(4)          |
| C15    | C16    | 1.471(2)          | C56    | C57    | 1.508(4)          |
| C16    | C17    | 1.391(2)          | C57    | C58    | 1.498(4)          |

**Table S5: Tabulated bond angles in [Ru][BPh<sub>4</sub>]-THF**

| Atom 1 | Atom 2 | Atom 3 | Angle (°) | Atom 1 | Atom 2 | Atom 3 | Angle (°)  |
|--------|--------|--------|-----------|--------|--------|--------|------------|
| N1     | Ru1    | N2     | 79.59(6)  | N3     | C15    | C16    | 114.57(14) |
| N1     | Ru1    | N3     | 95.15(5)  | C14    | C15    | C16    | 123.84(16) |
| N1     | Ru1    | N4     | 172.44(6) | N4     | C16    | C15    | 114.52(14) |
| N1     | Ru1    | N5     | 96.22(6)  | N4     | C16    | C17    | 121.25(16) |
| N1     | Ru1    | N6     | 87.41(5)  | C17    | C16    | C15    | 124.17(16) |
| N3     | Ru1    | N2     | 87.46(5)  | C18    | C17    | C16    | 119.68(17) |
| N4     | Ru1    | N2     | 95.81(6)  | C19    | C18    | C17    | 118.91(17) |
| N4     | Ru1    | N3     | 78.57(5)  | C18    | C19    | C20    | 119.13(17) |
| N5     | Ru1    | N2     | 173.59(6) | N4     | C20    | C19    | 122.80(17) |
| N5     | Ru1    | N3     | 97.80(5)  | N5     | C21    | C22    | 122.31(18) |
| N5     | Ru1    | N4     | 88.85(5)  | C23    | C22    | C21    | 119.26(18) |
| N5     | Ru1    | N6     | 78.92(6)  | C24    | C23    | C22    | 119.26(17) |
| N6     | Ru1    | N2     | 95.96(6)  | C23    | C24    | C25    | 119.34(18) |

|     |     |     |            |     |     |     |            |
|-----|-----|-----|------------|-----|-----|-----|------------|
| N6  | Ru1 | N3  | 176.06(5)  | N5  | C25 | C24 | 121.59(17) |
| N6  | Ru1 | N4  | 99.09(5)   | N5  | C25 | C26 | 114.72(14) |
| C58 | O1  | C55 | 110.3(2)   | C24 | C25 | C26 | 123.69(17) |
| C1  | N1  | Ru1 | 126.70(12) | N6  | C26 | C25 | 114.79(15) |
| C1  | N1  | C5  | 118.78(15) | N6  | C26 | C27 | 121.29(17) |
| C5  | N1  | Ru1 | 114.51(12) | C27 | C26 | C25 | 123.92(17) |
| C6  | N2  | Ru1 | 113.95(11) | C28 | C27 | C26 | 119.44(19) |
| C10 | N2  | Ru1 | 126.91(13) | C29 | C28 | C27 | 119.22(18) |
| C10 | N2  | C6  | 119.12(15) | C28 | C29 | C30 | 119.04(18) |
| C11 | N3  | Ru1 | 125.60(12) | N6  | C30 | C29 | 122.59(18) |
| C11 | N3  | C15 | 118.51(15) | C32 | C31 | B1  | 121.90(18) |
| C15 | N3  | Ru1 | 115.85(11) | C32 | C31 | C36 | 114.77(19) |
| C16 | N4  | Ru1 | 116.00(11) | C36 | C31 | B1  | 123.07(18) |
| C20 | N4  | Ru1 | 125.77(12) | C33 | C32 | C31 | 122.9(2)   |
| C20 | N4  | C16 | 118.21(15) | C34 | C33 | C32 | 120.3(2)   |
| C21 | N5  | Ru1 | 126.07(12) | C35 | C34 | C33 | 118.6(2)   |
| C21 | N5  | C25 | 118.23(15) | C34 | C35 | C36 | 120.6(2)   |
| C25 | N5  | Ru1 | 115.68(11) | C35 | C36 | C31 | 122.8(2)   |
| C26 | N6  | Ru1 | 115.65(11) | C38 | C37 | B1  | 121.32(15) |
| C30 | N6  | Ru1 | 125.74(12) | C42 | C37 | B1  | 123.18(16) |
| C30 | N6  | C26 | 118.42(15) | C42 | C37 | C38 | 115.22(16) |
| C31 | B1  | C37 | 112.20(14) | C39 | C38 | C37 | 122.65(17) |
| C31 | B1  | C43 | 103.97(13) | C40 | C39 | C38 | 120.15(19) |
| C31 | B1  | C49 | 111.00(15) | C39 | C40 | C41 | 118.89(18) |
| C37 | B1  | C43 | 113.72(15) | C40 | C41 | C42 | 120.65(18) |
| C37 | B1  | C49 | 104.59(13) | C41 | C42 | C37 | 122.41(18) |
| C43 | B1  | C49 | 111.55(14) | C44 | C43 | B1  | 125.83(16) |
| N1  | C1  | C2  | 123.56(18) | C44 | C43 | C48 | 115.11(16) |
| C1  | C2  | C3  | 118.16(19) | C48 | C43 | B1  | 118.92(16) |
| C4  | C3  | C2  | 119.76(18) | C43 | C44 | C45 | 122.48(18) |
| C3  | C4  | C5  | 120.61(19) | C46 | C45 | C44 | 120.55(19) |
| N1  | C5  | C4  | 118.93(18) | C45 | C46 | C47 | 118.92(18) |
| N1  | C5  | C6  | 115.48(15) | C46 | C47 | C48 | 120.01(18) |
| C6  | C5  | C4  | 125.59(17) | C47 | C48 | C43 | 122.93(18) |
| N2  | C6  | C5  | 116.05(15) | C50 | C49 | B1  | 124.51(15) |
| N2  | C6  | C7  | 118.80(18) | C50 | C49 | C54 | 115.12(16) |
| C5  | C6  | C7  | 125.12(18) | C54 | C49 | B1  | 120.20(15) |
| C8  | C7  | C6  | 120.7(2)   | C51 | C50 | C49 | 122.87(17) |
| C7  | C8  | C9  | 119.55(18) | C52 | C51 | C50 | 119.99(17) |
| C10 | C9  | C8  | 118.5(2)   | C51 | C52 | C53 | 119.02(18) |
| N2  | C10 | C9  | 123.30(19) | C52 | C53 | C54 | 120.26(18) |
| N3  | C11 | C12 | 122.29(17) | C53 | C54 | C49 | 122.72(18) |
| C13 | C12 | C11 | 119.22(17) | O1  | C55 | C56 | 107.1(2)   |
| C14 | C13 | C12 | 119.15(17) | C57 | C56 | C55 | 103.1(2)   |
| C13 | C14 | C15 | 119.22(17) | C58 | C57 | C56 | 102.4(2)   |
| N3  | C15 | C14 | 121.54(16) | O1  | C58 | C57 | 107.2(2)   |

### 4.3 Crystallographic collection data and full bond information for [Ru][BPh<sub>4</sub>]-MeCN

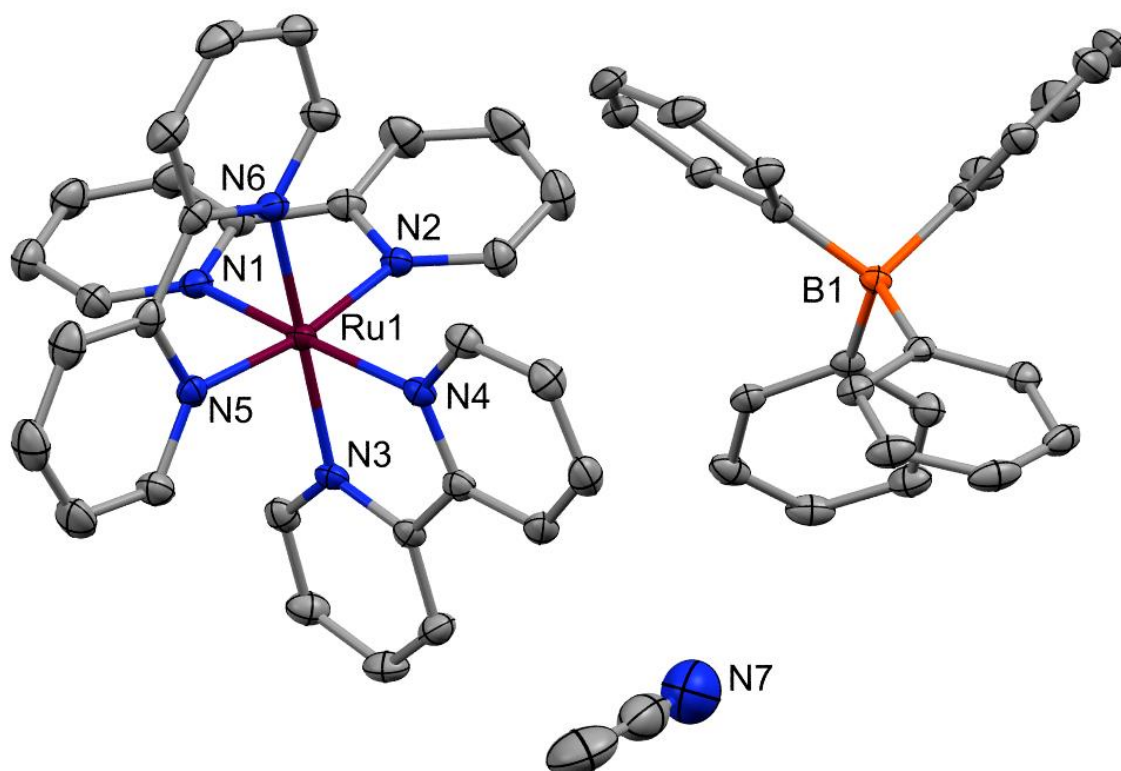

Figure S52: Solid-state molecular structure of [Ru][BPh<sub>4</sub>]-MeCN. Ellipsoids drawn at 50% probability. H atoms omitted for clarity. Atom colours: Ru, burgundy; N, blue; B, orange; C, grey.

Table S6: Crystallographic collection data and structure refinement details for [Ru][BPh<sub>4</sub>]-MeCN

| Empirical formula                           | C <sub>56</sub> H <sub>47</sub> BN <sub>7</sub> Ru            |
|---------------------------------------------|---------------------------------------------------------------|
| Formula weight                              | 929.934                                                       |
| Temperature/K                               | 149.9(6)                                                      |
| Crystal system                              | triclinic                                                     |
| Space group                                 | P-1                                                           |
| a/Å                                         | 12.3868(4)                                                    |
| b/Å                                         | 13.6724(4)                                                    |
| c/Å                                         | 14.1067(5)                                                    |
| α/°                                         | 98.518(3)                                                     |
| β/°                                         | 108.278(3)                                                    |
| γ/°                                         | 96.802(3)                                                     |
| Volume/Å <sup>3</sup>                       | 2208.65(14)                                                   |
| Z                                           | 2                                                             |
| ρ <sub>calc</sub> /cm <sup>3</sup>          | 1.398                                                         |
| μ/mm <sup>-1</sup>                          | 0.404                                                         |
| F(000)                                      | 960.0                                                         |
| Crystal size/mm <sup>3</sup>                | 0.3 × 0.2 × 0.1                                               |
| Radiation                                   | Mo Kα (λ = 0.71073)                                           |
| 2θ range for data collection/°              | 6.02 to 54.96                                                 |
| Index ranges                                | -15 ≤ h ≤ 16, -17 ≤ k ≤ 17, -17 ≤ l ≤ 17                      |
| Reflections collected                       | 19980                                                         |
| Independent reflections                     | 9825 [R <sub>int</sub> = 0.0358, R <sub>sigma</sub> = 0.0656] |
| Data/restraints/parameters                  | 9825/0/587                                                    |
| Goodness-of-fit on F <sup>2</sup>           | 1.047                                                         |
| Final R indexes [I >= 2σ (I)]               | R <sub>1</sub> = 0.0441, wR <sub>2</sub> = 0.0842             |
| Final R indexes [all data]                  | R <sub>1</sub> = 0.0604, wR <sub>2</sub> = 0.0912             |
| Largest diff. peak/hole / e Å <sup>-3</sup> | 0.61/-0.81                                                    |

**Table S7: Tabulated bond distances in [Ru][BPh<sub>4</sub>]-MeCN**

| Atom 1 | Atom 2 | Bond Distance (Å) | Atom 1 | Atom 2 | Bond Distance (Å) |
|--------|--------|-------------------|--------|--------|-------------------|
| Ru1    | N1     | 2.059 (2)         | C17    | C18    | 1.374 (4)         |
| Ru1    | N2     | 2.048 (2)         | C18    | C19    | 1.380 (4)         |
| Ru1    | N3     | 2.054 (2)         | C19    | C20    | 1.377 (4)         |
| Ru1    | N4     | 2.054 (2)         | C21    | C22    | 1.369 (4)         |
| Ru1    | N5     | 2.044 (2)         | C22    | C23    | 1.376 (4)         |
| Ru1    | N6     | 2.050 (2)         | C23    | C24    | 1.375 (4)         |
| B1     | C31    | 1.641 (4)         | C24    | C25    | 1.401 (4)         |
| B1     | C37    | 1.648 (4)         | C25    | C26    | 1.442 (4)         |
| B1     | C43    | 1.645 (4)         | C26    | C27    | 1.405 (4)         |
| B1     | C49    | 1.639 (4)         | C27    | C28    | 1.380 (4)         |
| N1     | C1     | 1.340 (3)         | C28    | C29    | 1.375 (4)         |
| N1     | C5     | 1.377 (3)         | C29    | C30    | 1.370 (4)         |
| N2     | C6     | 1.381 (3)         | C31    | C32    | 1.399 (4)         |
| N2     | C10    | 1.337 (3)         | C31    | C36    | 1.402 (4)         |
| N3     | C11    | 1.344 (3)         | C32    | C33    | 1.382 (4)         |
| N3     | C15    | 1.362 (3)         | C33    | C34    | 1.379 (4)         |
| N4     | C16    | 1.363 (3)         | C34    | C35    | 1.380 (4)         |
| N4     | C20    | 1.351 (3)         | C35    | C36    | 1.384 (4)         |
| N5     | C21    | 1.350 (3)         | C37    | C38    | 1.400 (3)         |
| N5     | C25    | 1.374 (3)         | C37    | C42    | 1.404 (4)         |
| N6     | C26    | 1.371 (3)         | C38    | C39    | 1.396 (4)         |
| N6     | C30    | 1.349 (3)         | C39    | C40    | 1.378 (4)         |
| N7     | C55    | 1.128 (5)         | C40    | C41    | 1.384 (4)         |
| C1     | C2     | 1.378 (4)         | C41    | C42    | 1.378 (4)         |
| C2     | C3     | 1.391 (4)         | C43    | C44    | 1.394 (4)         |
| C3     | C4     | 1.367 (4)         | C43    | C48    | 1.402 (3)         |
| C4     | C5     | 1.407 (4)         | C44    | C45    | 1.391 (4)         |
| C5     | C6     | 1.432 (4)         | C45    | C46    | 1.372 (4)         |
| C6     | C7     | 1.401 (4)         | C46    | C47    | 1.376 (4)         |
| C7     | C8     | 1.367 (4)         | C47    | C48    | 1.385 (4)         |
| C8     | C9     | 1.386 (4)         | C49    | C50    | 1.401 (4)         |
| C9     | C10    | 1.370 (4)         | C49    | C54    | 1.400 (3)         |
| C11    | C12    | 1.375 (4)         | C50    | C51    | 1.397 (4)         |
| C12    | C13    | 1.385 (4)         | C51    | C52    | 1.374 (4)         |
| C13    | C14    | 1.376 (4)         | C52    | C53    | 1.381 (4)         |
| C14    | C15    | 1.392 (4)         | C53    | C54    | 1.388 (4)         |
| C15    | C16    | 1.463 (3)         | C55    | C56    | 1.436 (6)         |
| C16    | C17    | 1.384 (4)         |        |        |                   |

**Table S8: Tabulated bond angles in [Ru][BPh<sub>4</sub>]-MeCN**

| Atom 1 | Atom 2 | Atom 3 | Angle (°)  | Atom 1 | Atom 2 | Atom 3 | Angle/°   |
|--------|--------|--------|------------|--------|--------|--------|-----------|
| N2     | Ru1    | N1     | 79.30 (8)  | C14    | C15    | N3     | 121.0 (2) |
| N3     | Ru1    | N1     | 97.59 (8)  | C16    | C15    | N3     | 114.8 (2) |
| N3     | Ru1    | N2     | 91.18 (8)  | C16    | C15    | C14    | 124.3 (2) |
| N4     | Ru1    | N1     | 172.64 (8) | C15    | C16    | N4     | 114.5 (2) |
| N4     | Ru1    | N2     | 94.47 (8)  | C17    | C16    | N4     | 121.0 (2) |
| N4     | Ru1    | N3     | 78.48 (8)  | C17    | C16    | C15    | 124.5 (2) |
| N5     | Ru1    | N1     | 94.34 (8)  | C18    | C17    | C16    | 120.4 (3) |
| N5     | Ru1    | N2     | 170.96 (9) | C19    | C18    | C17    | 118.7 (3) |
| N5     | Ru1    | N3     | 96.05 (8)  | C20    | C19    | C18    | 119.2 (3) |
| N5     | Ru1    | N4     | 92.28 (8)  | C19    | C20    | N4     | 122.7 (3) |
| N6     | Ru1    | N1     | 87.92 (8)  | C22    | C21    | N5     | 123.5 (3) |
| N6     | Ru1    | N2     | 94.12 (8)  | C23    | C22    | C21    | 119.1 (3) |
| N6     | Ru1    | N3     | 172.99 (8) | C24    | C23    | C22    | 119.1 (3) |



|     |     |     |             |     |     |     |           |
|-----|-----|-----|-------------|-----|-----|-----|-----------|
| N6  | Ru1 | N4  | 96.51 (8)   | C25 | C24 | C23 | 120.4 (3) |
| N6  | Ru1 | N5  | 79.13 (9)   | C24 | C25 | N5  | 120.0 (3) |
| C37 | B1  | C31 | 114.0 (2)   | C26 | C25 | N5  | 115.0 (2) |
| C43 | B1  | C31 | 105.1 (2)   | C26 | C25 | C24 | 125.0 (3) |
| C43 | B1  | C37 | 110.3 (2)   | C25 | C26 | N6  | 115.2 (2) |
| C49 | B1  | C31 | 110.9 (2)   | C27 | C26 | N6  | 119.8 (3) |
| C49 | B1  | C37 | 105.3 (2)   | C27 | C26 | C25 | 125.0 (3) |
| C49 | B1  | C43 | 111.5 (2)   | C28 | C27 | C26 | 119.8 (3) |
| C1  | N1  | Ru1 | 127.42 (18) | C29 | C28 | C27 | 119.8 (3) |
| C5  | N1  | Ru1 | 114.34 (17) | C30 | C29 | C28 | 118.5 (3) |
| C5  | N1  | C1  | 118.2 (2)   | C29 | C30 | N6  | 123.5 (3) |
| C6  | N2  | Ru1 | 114.57 (17) | C32 | C31 | B1  | 122.0 (2) |
| C10 | N2  | Ru1 | 127.05 (18) | C36 | C31 | B1  | 123.6 (2) |
| C10 | N2  | C6  | 118.2 (2)   | C36 | C31 | C32 | 114.3 (2) |
| C11 | N3  | Ru1 | 125.54 (18) | C33 | C32 | C31 | 123.4 (3) |
| C15 | N3  | Ru1 | 116.10 (16) | C34 | C33 | C32 | 120.0 (3) |
| C15 | N3  | C11 | 118.4 (2)   | C35 | C34 | C33 | 118.9 (3) |
| C16 | N4  | Ru1 | 116.17 (16) | C36 | C35 | C34 | 120.0 (3) |
| C20 | N4  | Ru1 | 125.76 (18) | C35 | C36 | C31 | 123.2 (3) |
| C20 | N4  | C16 | 118.0 (2)   | C38 | C37 | B1  | 125.3 (2) |
| C21 | N5  | Ru1 | 126.68 (19) | C42 | C37 | B1  | 120.0 (2) |
| C25 | N5  | Ru1 | 115.20 (17) | C42 | C37 | C38 | 114.6 (2) |
| C25 | N5  | C21 | 118.0 (2)   | C39 | C38 | C37 | 122.6 (3) |
| C26 | N6  | Ru1 | 115.11 (17) | C40 | C39 | C38 | 120.5 (3) |
| C30 | N6  | Ru1 | 126.31 (19) | C41 | C40 | C39 | 118.5 (2) |
| C30 | N6  | C26 | 118.6 (2)   | C42 | C41 | C40 | 120.4 (3) |
| C2  | C1  | N1  | 123.6 (3)   | C41 | C42 | C37 | 123.3 (2) |
| C3  | C2  | C1  | 118.5 (3)   | C44 | C43 | B1  | 125.1 (2) |
| C4  | C3  | C2  | 119.3 (3)   | C48 | C43 | B1  | 119.6 (2) |
| C5  | C4  | C3  | 120.2 (3)   | C48 | C43 | C44 | 115.1 (2) |
| C4  | C5  | N1  | 120.1 (2)   | C45 | C44 | C43 | 122.5 (3) |
| C6  | C5  | N1  | 115.8 (2)   | C46 | C45 | C44 | 120.4 (3) |
| C6  | C5  | C4  | 124.1 (2)   | C47 | C46 | C45 | 119.0 (3) |
| C5  | C6  | N2  | 115.2 (2)   | C48 | C47 | C46 | 120.1 (3) |
| C7  | C6  | N2  | 119.8 (2)   | C47 | C48 | C43 | 122.7 (3) |
| C7  | C6  | C5  | 125.0 (3)   | C50 | C49 | B1  | 122.6 (2) |
| C8  | C7  | C6  | 120.1 (3)   | C54 | C49 | B1  | 122.3 (2) |
| C9  | C8  | C7  | 119.4 (3)   | C54 | C49 | C50 | 115.0 (2) |
| C10 | C9  | C8  | 118.6 (3)   | C51 | C50 | C49 | 122.6 (3) |
| C9  | C10 | N2  | 123.6 (3)   | C52 | C51 | C50 | 120.0 (3) |
| C12 | C11 | N3  | 122.9 (3)   | C53 | C52 | C51 | 119.5 (3) |
| C13 | C12 | C11 | 119.0 (2)   | C54 | C53 | C52 | 119.7 (3) |
| C14 | C13 | C12 | 118.9 (3)   | C53 | C54 | C49 | 123.2 (3) |
| C15 | C14 | C13 | 119.8 (3)   | C56 | C55 | N7  | 179.1 (5) |

## 5 References

- 1 I.S. Weitz, M. Rabinovitz, *J. Chem. Soc. Perkin Trans. 1*, 1993, 117-120
- 2 S.J. Horsewill, G. Hierlmeier, Z. Farasat, J.P. Barham and D.J. Scott, *ACS Cat.*, 2023, **13**, 9392-9403
- 3 U. Lennert, P.B. Arockiam, V. Streitferdt, D.J. Scott, C. Rödl, R.M. Gschwind and R. Wolf, *Nature Catal.* 2019, **2**, 1101-1106.
- 4 a) O.V. Dolomanov, L.J. Bourhis, R.J. Gildea, J.A.K. Howard and H Puschmann, "Olex2: A complete structure solution, refinement and analysis program", *J. Appl. Cryst.*, 2009, **42**, 339-341; b) G. Sheldrick, "Crystal Structure Refinement with SHELXL", *Acta Crystallogr. C*, 2015, **71**, 3-8.
- 5 M. Biner, H.-B. Bürgi, A. Ludi and C. Röhr, *J. Am. Chem. Soc.*, 1992, **114**, 5197-5203.
- 6 E.E. Pérez-Cordero, C. Campana and L. Echegoyen, *Angew. Chem. Intl. Ed. Engl.*, 1997, **36**, 137-140.
- 7 J. Breu, H. Domel and A. Stoll, *Eur. J. Inorg. Chem.*, 2000, **11**, 2401-2408
